# Supplementary material for: Amino-nitramino functionalized triazolotriazines: a good balance between high energy and low sensitivity
Source: Royal Society of Chemistry journal article supplement (doi:10.1039/c8dt03126f), 2018-01-01
Supplement: c8dt03126f1.pdf [file c8dt03126f1.pdf]

## Supporting Information (SI)

### **Amino-nitramino functionalized triazolotriazines: a good balance between high energy and low sensitivity**

Jinchao Ma,<sup>a</sup> Guangbin Cheng,<sup>a</sup> Xuehai Ju,<sup>a</sup> Zhenxin Yi,<sup>a</sup> Shunguan Zhu,<sup>a</sup> Zaichao Zhang<sup>b</sup> and Hongwei Yang<sup>\*a</sup>

*<sup>a</sup>School of Chemical Engineering, Nanjing University of Science and Technology, Xiaolingwei*

*200, Nanjing, Jiangsu, China. Fax: (+)86 25 8430 3286*

*E-mail: [hyang@mail.njust.edu.cn](mailto:hyang@mail.njust.edu.cn)*

*<sup>b</sup>Jiangsu Key Laboratory for the Chemistry of Low-dimensional Materials, School of Chemistry  
and Chemical Engineering, Huaiyin Normal University*

## Table of Contents

|                                                                                                                             |    |
|-----------------------------------------------------------------------------------------------------------------------------|----|
| 1. Computational data.....                                                                                                  | 1  |
| 2. Crystallographic data and refinement parameters of $2 \cdot 2\text{H}_2\text{O}$ and $4 \cdot 3\text{H}_2\text{O}$ ..... | 5  |
| 3. Mass spectra of compound 2.....                                                                                          | 11 |
| 4. $^1\text{H}$ NMR and $^{13}\text{C}$ NMR spectra.....                                                                    | 12 |
| 5. Differential scanning calorimetry (DSC) curves .....                                                                     | 22 |

## 1. Computational data

All computations were carried out using the Gaussian09 program package.<sup>1</sup> The elementary geometric optimization and the frequency analysis were performed at the level of the Becke three parameter, Lee-Yan-Parr (B3LYP)<sup>2</sup> functional with the 6-311+G\*\* basis set.<sup>3</sup> All of the optimized structures were characterized to be local energy minima on the potential surface without any imaginary frequencies. Atomization energies were calculated by the CBS-4M.<sup>4</sup> All the optimized structures were characterized to be true local energy minima on the potential-energy surface without imaginary frequencies.

The predictions of heats of formation (HOF) of compounds used the hybrid DFTB3LYP methods with the 6-311+G\*\* basis set through designed isodesmic reactions (Scheme S1).

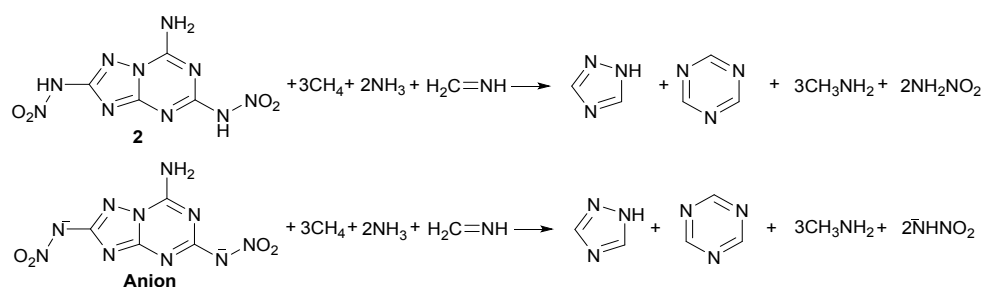

**Scheme S1.** Isodesmic and tautomeric reactions to compute the HOF.

The change of enthalpy for the reactions at 298 K can be expressed as Equation (1).

$$\Delta H_{298} = \sum \Delta_f H_P - \sum \Delta_f H_R \quad (1)$$

$\Delta_f H_R$  and  $\Delta_f H_P$  are the HOF of the reactants and products at 298 K, respectively, and  $\Delta H_{298}$  can be calculated from the following expression, see Equation (2).

$$\Delta H_{298} = \Delta E_{298} + \Delta(PV) = \Delta E_0 + \Delta ZPE + \Delta H_T + \Delta nRT \quad (2)$$

$\Delta E_0$  is the change in total energy between the products and the reactants at 0 K;  $\Delta ZPE$  is the difference between the zero-point energies (ZPE) of the products and the reactants at 0 K;  $\Delta H_T$  is the thermal correction from 0 to 298 K. The  $\Delta(PV)$  value in Equation (2) is the  $PV$  work term. It equals  $\Delta nRT$  for the reactions of an ideal gas. For the isodesmic reactions,  $\Delta n = 0$ , so  $\Delta(PV) = 0$ . On the left side of Equation (1), apart from target compound, all the others are called reference compounds. The HOF of reference compounds are available either from experiments<sup>5</sup> or from the high-level computing such as CBS-4M.

$$\Delta H_f^\circ (\text{salt}, 298 \text{ K}) = \Delta H_f^\circ(\text{cation}, 298 \text{ K}) + \Delta H_f^\circ(\text{anion}, 298 \text{ K}) - \Delta H_L \quad (3)$$

$$\Delta H_L = U_{POT} + [p(n_M/2-2) + q(n_X/2-2)] RT \quad (4)$$

$$U_{POT} (\text{kJ} \cdot \text{mol}^{-1}) = \gamma (\rho_m/M_m)^{1/3} + \delta \quad (5)$$

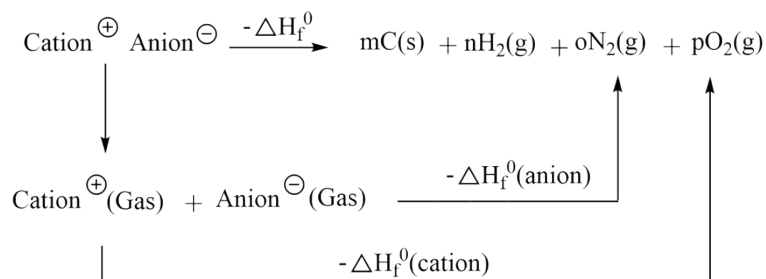

**Fig. S1** Born-Haber Cycle for the Formation of Energetic Salts.

Based on Born-Haber energy cycles, the heat of formation of a salt can be simplified and expressed as Equation (3), in which  $\Delta H_L$  is the lattice energy of the salt. This quantity could be predicted by the formula suggested by Jenkins et al (Equation (4)), in which  $n_M$  and  $n_X$  depend on the nature of the ions  $Mp^+$  and  $Xq^-$ , respectively. The equation for the lattice potential energy,  $U_{POT}$ , takes the form of equation (5), where  $\rho_m$  ( $\text{g cm}^{-3}$ ) is the density,  $M_m$  ( $\text{g}$ ) is the chemical formula mass of the ionic material and the coefficients  $\gamma$  ( $\text{kJ mol}^{-1} \text{ cm}$ ) and  $\delta$  ( $\text{kJ mol}^{-1}$ ) are assigned literature values.

**Table S1.** *Ab initio* computational values of small molecules used in isodesmic and tautomeric reactions.

| Compound                                                                            | $E_0^a$  | ZPE <sup>b</sup> | $H_f^c$ | HOF <sup>d</sup>     |
|-------------------------------------------------------------------------------------|----------|------------------|---------|----------------------|
| <b>2</b>                                                                            | -1003.27 | 347.17           | 42.35   | 544.93               |
| CH <sub>4</sub>                                                                     | -40.53   | 112.26           | 10.04   | -74.6 <sup>e</sup>   |
| NH <sub>3</sub>                                                                     | -56.58   | 86.27            | 10.05   | -45.9 <sup>e</sup>   |
| CNH <sub>3</sub>                                                                    | -94.66   | 100.29           | 10.19   | 69.0 <sup>f</sup>    |
| CH <sub>3</sub> NH <sub>2</sub>                                                     | -95.89   | 160.78           | 11.64   | -22.5 <sup>e</sup>   |
| NH <sub>2</sub> NO <sub>2</sub>                                                     | -261.12  | 98.79            | 12.39   | -3.9 <sup>e</sup>    |
| NHNO <sub>2</sub> <sup>-</sup>                                                      | -260.57  | 65.76            | 11.37   | -120.22 <sup>g</sup> |
|  | -242.32  | 150.39           | 12.06   | 192.7 <sup>g</sup>   |
|  | -280.44  | 164.06           | 13.6    | 224.7 <sup>g</sup>   |

<sup>a</sup> Total energy calculated by B3LYP/6-311+G\*\* method (a.u.=2625.5  $\text{kJ mol}^{-1}$ ); <sup>b</sup> zero-point correction ( $\text{kJ mol}^{-1}$ ); <sup>c</sup> thermal correction to enthalpy ( $\text{kJ mol}^{-1}$ ); <sup>d</sup> heat of formation ( $\text{kJ mol}^{-1}$ ); <sup>e</sup> D. R. Lide, CRC Handbook of Chemistry and Physics, 84th Edition (2003-2004), CRC Press/Taylor and Francis, Boca Raton, FL; <sup>f</sup> Ref. 5; <sup>g</sup> calculated by CBS-4 Enthalpy.

**Table S2** Natural Population Analysis of **1**

| Atom | No | Natural Charge | Core    | Valence | Rydberg | Total   |
|------|----|----------------|---------|---------|---------|---------|
| C    | 1  | 0.55647        | 1.99946 | 3.40740 | 0.03667 | 5.44353 |
| N    | 2  | -0.57060       | 1.99939 | 5.55359 | 0.01762 | 7.57060 |
| N    | 3  | -0.29034       | 1.99919 | 5.26132 | 0.02982 | 7.29034 |
| N    | 4  | -0.42164       | 1.99941 | 5.39917 | 0.02306 | 7.42164 |
| C    | 5  | 0.59800        | 1.99929 | 3.36762 | 0.03509 | 5.40200 |
| N    | 6  | -0.58253       | 1.99929 | 5.56495 | 0.01829 | 7.58253 |
| C    | 7  | 0.65529        | 1.99933 | 3.31578 | 0.02959 | 5.34471 |
| N    | 8  | -0.62517       | 1.99933 | 5.60753 | 0.01831 | 7.62517 |
| C    | 9  | 0.61524        | 1.99936 | 3.34815 | 0.03725 | 5.38476 |
| N    | 10 | -0.77209       | 1.99939 | 5.75619 | 0.01651 | 7.77209 |
| N    | 11 | -0.79096       | 1.99938 | 5.77348 | 0.01810 | 7.79096 |
| N    | 12 | -0.76889       | 1.99940 | 5.75502 | 0.01448 | 7.76889 |
| H    | 13 | 0.39955        | 0.00000 | 0.59819 | 0.00226 | 0.60045 |
| H    | 14 | 0.39549        | 0.00000 | 0.60227 | 0.00225 | 0.60451 |
| H    | 15 | 0.39445        | 0.00000 | 0.60315 | 0.00239 | 0.60555 |
| H    | 16 | 0.38825        | 0.00000 | 0.60936 | 0.00238 | 0.61175 |
| H    | 17 | 0.40739        | 0.00000 | 0.59036 | 0.00225 | 0.59261 |
| H    | 18 | 0.41208        | 0.00000 | 0.58586 | 0.00206 | 0.58792 |

**Table S3** Natural Population Analysis of **2**

| Atom | No | Natural Charge | Core    | Valence | Rydberg | Total   |
|------|----|----------------|---------|---------|---------|---------|
| C    | 1  | 0.52384        | 1.99930 | 3.43773 | 0.03913 | 5.47616 |
| N    | 2  | -0.53304       | 1.99932 | 5.51489 | 0.01883 | 7.53304 |
| N    | 3  | -0.27063       | 1.99910 | 5.24218 | 0.02935 | 7.27063 |
| N    | 4  | -0.34957       | 1.99937 | 5.32748 | 0.02272 | 7.34957 |
| C    | 5  | 0.58942        | 1.99923 | 3.37495 | 0.03641 | 5.41058 |
| N    | 6  | -0.53876       | 1.99924 | 5.52042 | 0.01911 | 7.53876 |
| C    | 7  | 0.65409        | 1.99927 | 3.31611 | 0.03053 | 5.34591 |
| N    | 8  | -0.55140       | 1.99923 | 5.53290 | 0.01927 | 7.55140 |
| C    | 9  | 0.59591        | 1.99922 | 3.36674 | 0.03814 | 5.40409 |
| N    | 10 | -0.43406       | 1.99924 | 5.41087 | 0.02395 | 7.43406 |
| N    | 11 | -0.42930       | 1.99922 | 5.40710 | 0.02297 | 7.42930 |
| N    | 12 | -0.74034       | 1.99937 | 5.72764 | 0.01333 | 7.74034 |

|   |    |          |         |         |         |         |
|---|----|----------|---------|---------|---------|---------|
| N | 13 | 0.62256  | 1.99962 | 4.32033 | 0.05750 | 6.37744 |
| O | 14 | -0.38903 | 1.99979 | 6.37381 | 0.01543 | 8.38903 |
| O | 15 | -0.35245 | 1.99978 | 6.33740 | 0.01527 | 8.35245 |
| N | 16 | 0.62333  | 1.99962 | 4.31910 | 0.05795 | 6.37667 |
| O | 17 | -0.34267 | 1.99978 | 6.32725 | 0.01565 | 8.34267 |
| O | 18 | -0.38704 | 1.99979 | 6.37166 | 0.01558 | 8.38704 |
| H | 19 | 0.42814  | 0.00000 | 0.56910 | 0.00276 | 0.57186 |
| H | 20 | 0.43066  | 0.00000 | 0.56666 | 0.00267 | 0.56934 |
| H | 21 | 0.42911  | 0.00000 | 0.56880 | 0.00209 | 0.57089 |
| H | 22 | 0.42125  | 0.00000 | 0.57654 | 0.00220 | 0.57875 |

## References

- 1 M. J. Frisch, G. W. Trucks, H. B. Schlegel, G. E. Scuseria, M. A. Robb, J. R. Cheeseman, V. G. Zakrzewski, J. A. Montgomery, R. E. Stratmann, J. C. Burant, S. Dapprich, J. M. Millam, A. D. Daniels, K. N. Kudin, M. C. Strain, O. Farkas, J. Tomasi, V. Barone, M. Cossi, R. Cammi, B. Mennucci, C. Pomelli, C. Adamo, S. Clifford, J. Ochterski, G. A. Petersson, P. Y. Ayala, Q. Cui, K. Morokuma, D. K. Malick, A. D. Rabuck, K. Raghavachari, J. B. Foresman, J. Cioslowski, J. V. Ortiz, A. G. Baboul, B. B. Stefanov, G. Liu, A. Liashenko, P. Piskorz, I. Komaromi, R. Gomperts, R. L. Martin, D. J. Fox, T. Keith, M. A. Laham, C. Y. Peng, A. Nanayakkara, C. Gonzalez, M. Challacombe, P. M. W. Gill, B. Johnson, W. Chen, M. W. Wong, J. L. Andres, C. Gonzalez, M. Head-Gordon, E. S. Replogle and J. A. Pople, Gaussian 09, revision A. 01; Gaussian, Inc.: Wallingford, CT, 2009.
- 2 (a) A. D. Becke, *J. Chem. Phys.*, 1993, **98**, 5648-5652; (b) P. J. Stephens, F. J. Devlin, C. F. Chabalowski and M. J. Frisch, *J. Phys. Chem.*, 1994, **98**, 11623-11627.
- 3 P. C. Hariharan and J. A. Pople, *Theor. Chim. Acta.*, 1973, **28**, 213-222.
- 4 J. W. Ochterski, G. A. Petersson and J. A. Montgomery, *J. Chem. Phys.*, 1996, **104**, 2598.
- 5 Peerboom, R.A.L.; Ingemann, S.; Nibbering, N.M.M.; Liebman, J.F., *J. Chem. Soc. Perkin Trans.*, 1990, **2**, 1825-1828.

## 2. Crystallographic data and refinement parameters of 2·2H<sub>2</sub>O and 4·3H<sub>2</sub>O

**Table S4** Crystallographic data and refinement parameters

|                                                                 | 2·2H <sub>2</sub> O                                             | 4·3H <sub>2</sub> O                                             |
|-----------------------------------------------------------------|-----------------------------------------------------------------|-----------------------------------------------------------------|
| CCDC number                                                     | 1584074                                                         | 1580294                                                         |
| Formula                                                         | C <sub>4</sub> H <sub>8</sub> N <sub>10</sub> O <sub>6</sub>    | C <sub>4</sub> H <sub>16</sub> N <sub>12</sub> O <sub>7</sub>   |
| weight [g mol <sup>-1</sup> ]                                   | 292.20                                                          | 344.29                                                          |
| Temperature [K]                                                 | 173                                                             | 173                                                             |
| Crystal system                                                  | Orthorhombic                                                    | Monoclinic                                                      |
| Space group                                                     | <i>Pca</i> 2 <sub>1</sub>                                       | <i>P</i> 2 <sub>1</sub> / <i>c</i>                              |
| Crystal size [mm]                                               | 0.330 x 0.160 x 0.020                                           | 0.310 x 0.140 x 0.080                                           |
| <i>a</i> [Å]                                                    | 8.9661(7)                                                       | 8.8384(9)                                                       |
| <i>b</i> [Å]                                                    | 6.7936(6)                                                       | 20.599(2)                                                       |
| <i>c</i> [Å]                                                    | 18.1976(17)                                                     | 7.5457(8)                                                       |
| $\alpha$ [°]                                                    | 90                                                              | 90                                                              |
| $\beta$ [°]                                                     | 90                                                              | 90.749(4)                                                       |
| $\gamma$ [°]                                                    | 90                                                              | 90                                                              |
| Cell volume [Å <sup>3</sup> ]                                   | 1108.45(17)                                                     | 1373.7(3)                                                       |
| <i>Z</i>                                                        | 4                                                               | 4                                                               |
| $\rho_{\text{calc}}$ [g cm <sup>-3</sup> ]                      | 1.751                                                           | 1.665                                                           |
| $\mu$ [mm <sup>-1</sup> ]                                       | 0.159                                                           | 0.151                                                           |
| <i>F</i> (000)                                                  | 600                                                             | 720                                                             |
| $\theta$ range [°]                                              | 3.743-25.490                                                    | 2.875-25.367                                                    |
|                                                                 | -10<= <i>h</i> <=10                                             | -8<= <i>h</i> <=10                                              |
| index ranges                                                    | -8<= <i>k</i> <=7                                               | -24<= <i>k</i> <=24                                             |
|                                                                 | -22<= <i>l</i> <=22                                             | -9<= <i>l</i> <=8                                               |
| Reflns collected                                                | 9606                                                            | 7267                                                            |
| indep ref./ <i>R</i> <sub>int</sub>                             | 2045/ 0.0971                                                    | 2492/ 0.0769                                                    |
| Goodness-of-fit on <i>F</i> <sup>2</sup>                        | 1.096                                                           | 1.034                                                           |
| Final <i>R</i> indices [ <i>I</i> >2 <i>sigma</i> ( <i>I</i> )] | <i>R</i> <sub>1</sub> = 0.0707, <i>wR</i> <sub>2</sub> = 0.1648 | <i>R</i> <sub>1</sub> = 0.0551, <i>wR</i> <sub>2</sub> = 0.1106 |
| <i>R</i> indices (all data)                                     | <i>R</i> <sub>1</sub> = 0.1092, <i>wR</i> <sub>2</sub> = 0.1894 | <i>R</i> <sub>1</sub> = 0.1104, <i>wR</i> <sub>2</sub> = 0.1321 |
| largest diff. peak / hole [e Å <sup>3</sup> ]                   | 0.377/ -0.396                                                   | 0.301/ -0.300                                                   |

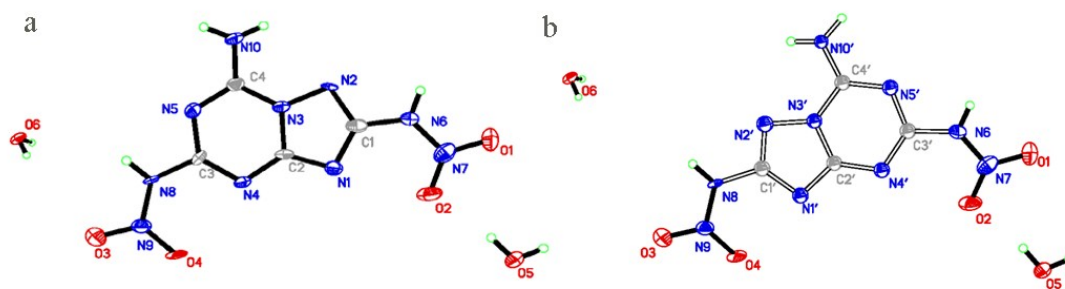

**Fig. S2** Single-crystal X-ray structure of 2·2H<sub>2</sub>O (ellipsoids are set at 50% probability) (a) The part of the 2-fold disordered atoms with higher occupancy (0.78); (b) The part of the 2-fold disordered atoms with lower occupancy (0.22)

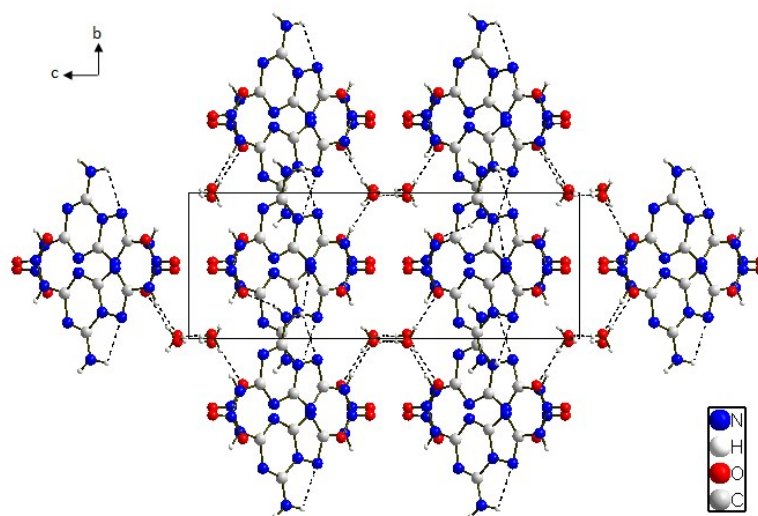

**Fig. S3** Packing diagram of 2·2H<sub>2</sub>O (with lower occupancy (0.22)) viewed down the a-axis. Unit cell indicated and dashed lines represent hydrogen bonding.

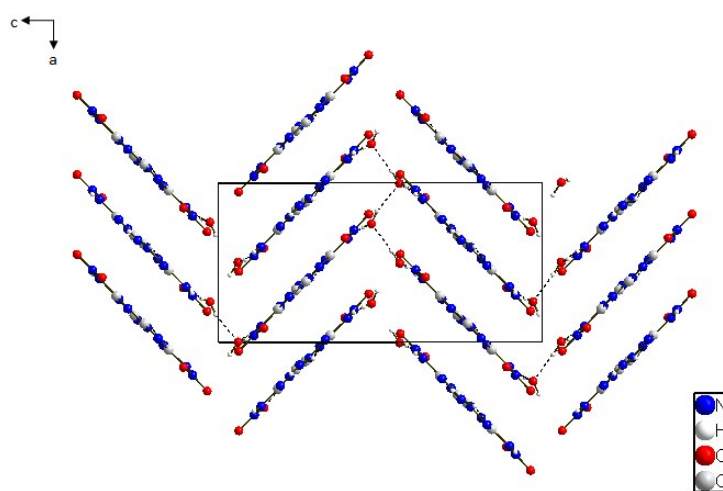

**Fig. S4** Packing diagram of 2·2H<sub>2</sub>O (with lower occupancy (0.22)) viewed down the b-axis. Unit cell indicated and dashed lines represent hydrogen bonding.



**Table S5** Bond lengths [Å] and angles [°] of compound **2**·2H<sub>2</sub>O

|                  |           |                     |           |
|------------------|-----------|---------------------|-----------|
| N(6)-N(7)        | 1.347(15) | C(2)-N(4)           | 1.35(2)   |
| N(6)-C(1)        | 1.395(15) | N(4)-C(3)           | 1.335(19) |
| N(6)-C(3')       | 1.40(2)   | C(3)-N(5)           | 1.364(19) |
| N(6)-H(6A)       | 0.85(3)   | N(5)-C(4)           | 1.343(18) |
| N(7)-O(1)        | 1.236(16) | C(4)-N(10)          | 1.311(15) |
| N(7)-O(2)        | 1.240(14) | N(10)-H(10A)        | 0.86(3)   |
| N(8)-N(9)        | 1.337(13) | N(10)-H(10B)        | 0.86(3)   |
| N(8)-C(1')       | 1.39(2)   | N(1')-C(2')         | 1.34(4)   |
| N(8)-C(3)        | 1.396(14) | N(1')-C(1')         | 1.35(3)   |
| N(8)-H(8A)       | 0.85(3)   | C(1')-N(2')         | 1.31(3)   |
| N(9)-O(3)        | 1.223(15) | C(1')-C(2')         | 2.03(4)   |
| N(9)-O(4)        | 1.229(12) | N(2')-N(3')         | 1.38(3)   |
| O(5)-H(5C)       | 0.8501    | N(3')-C(4')         | 1.36(2)   |
| O(5)-H(5D)       | 0.8499    | N(3')-C(2')         | 1.37(2)   |
| O(6)-H(6C)       | 0.82(3)   | C(2')-N(4')         | 1.35(4)   |
| O(6)-H(6D)       | 0.82(3)   | N(4')-C(3')         | 1.35(3)   |
| N(1)-C(2)        | 1.34(2)   | C(3')-N(5')         | 1.37(3)   |
| N(1)-C(1)        | 1.349(19) | N(5')-C(4')         | 1.34(3)   |
| C(1)-N(2)        | 1.318(17) | C(4')-N(10')        | 1.32(3)   |
| N(2)-N(3)        | 1.379(16) | N(10')-H(10C)       | 0.86(3)   |
| N(3)-C(4)        | 1.353(13) | N(10')-H(10D)       | 0.87(3)   |
| N(3)-C(2)        | 1.365(13) |                     |           |
| N(7)-N(6)-C(1)   | 125.0(11) | N(10)-C(4)-N(5)     | 122.5(12) |
| N(7)-N(6)-C(3')  | 132(2)    | N(10)-C(4)-N(3)     | 119.8(11) |
| N(7)-N(6)-H(6A)  | 118(8)    | N(5)-C(4)-N(3)      | 117.8(11) |
| C(1)-N(6)-H(6A)  | 117(8)    | C(4)-N(10)-H(10A)   | 114(6)    |
| C(3')-N(6)-H(6A) | 110(8)    | C(4)-N(10)-H(10B)   | 115(6)    |
| O(1)-N(7)-O(2)   | 126.3(12) | H(10A)-N(10)-H(10B) | 131(10)   |
| O(1)-N(7)-N(6)   | 115.2(11) | C(2')-N(1')-C(1')   | 98(2)     |
| O(2)-N(7)-N(6)   | 118.5(12) | N(2')-C(1')-N(1')   | 124(3)    |
| N(9)-N(8)-C(1')  | 122(3)    | N(2')-C(1')-N(8)    | 112(4)    |
| N(9)-N(8)-C(3)   | 127.8(11) | N(1')-C(1')-N(8)    | 124(4)    |
| N(9)-N(8)-H(8A)  | 120(8)    | N(2')-C(1')-C(2')   | 82.7(18)  |
| C(1')-N(8)-H(8A) | 118(8)    | N(1')-C(1')-C(2')   | 40.8(15)  |
| C(3)-N(8)-H(8A)  | 112(8)    | N(8)-C(1')-C(2')    | 165(4)    |
| O(3)-N(9)-O(4)   | 123.4(10) | C(1')-N(2')-N(3')   | 96(2)     |

|                  |           |                      |          |
|------------------|-----------|----------------------|----------|
| O(3)-N(9)-N(8)   | 115.7(10) | C(4')-N(3')-C(2')    | 121(3)   |
| O(4)-N(9)-N(8)   | 120.9(11) | C(4')-N(3')-N(2')    | 127(3)   |
| H(5C)-O(5)-H(5D) | 108.6     | C(2')-N(3')-N(2')    | 111(2)   |
| H(6C)-O(6)-H(6D) | 101(10)   | N(1')-C(2')-N(4')    | 127(3)   |
| C(2)-N(1)-C(1)   | 99.2(12)  | N(1')-C(2')-N(3')    | 111(3)   |
| N(2)-C(1)-N(1)   | 121.7(12) | N(4')-C(2')-N(3')    | 123(3)   |
| N(2)-C(1)-N(6)   | 113.9(12) | N(1')-C(2')-C(1')    | 41.3(16) |
| N(1)-C(1)-N(6)   | 124.5(13) | N(4')-C(2')-C(1')    | 167(4)   |
| C(1)-N(2)-N(3)   | 97.5(9)   | N(3')-C(2')-C(1')    | 69.4(18) |
| C(4)-N(3)-C(2)   | 121.8(12) | C(3')-N(4')-C(2')    | 114(3)   |
| C(4)-N(3)-N(2)   | 127.1(10) | N(4')-C(3')-N(5')    | 126(3)   |
| C(2)-N(3)-N(2)   | 111.1(12) | N(4')-C(3')-N(6)     | 121(3)   |
| N(1)-C(2)-N(4)   | 126.9(11) | N(5')-C(3')-N(6)     | 113(3)   |
| N(1)-C(2)-N(3)   | 110.5(16) | C(4')-N(5')-C(3')    | 119(3)   |
| N(4)-C(2)-N(3)   | 122.6(15) | N(10')-C(4')-N(5')   | 123(3)   |
| C(3)-N(4)-C(2)   | 112.4(12) | N(10')-C(4')-N(3')   | 119(2)   |
| N(4)-C(3)-N(5)   | 128.2(12) | N(5')-C(4')-N(3')    | 118(2)   |
| N(4)-C(3)-N(8)   | 121.5(14) | C(4')-N(10')-H(10C)  | 113(7)   |
| N(5)-C(3)-N(8)   | 110.3(12) | C(4')-N(10')-H(10D)  | 113(7)   |
| C(4)-N(5)-C(3)   | 117.1(11) | H(10C)-N(10')-H(10D) | 129(10)  |

**Table S6** Hydrogen bonds of compound **2**·2H<sub>2</sub>O [Å and °]

| D-H···A                            | d(D-H)/ Å | d(H···A)/ Å | d(D···A)/ Å | <(DHA)/ ° | comment |
|------------------------------------|-----------|-------------|-------------|-----------|---------|
| O(5)-H(5C)···O(6) <sup>iv</sup>    | 0.85      | 1.89        | 2.734(15)   | 172       | Inter   |
| O(5)-H(5D)···O(2)                  | 0.85      | 2.01        | 2.854(12)   | 171       | Inter   |
| N(6)-H(6A)···O(5) <sup>iii</sup>   | 0.85(10)  | 1.89(9)     | 2.736(13)   | 179(14)   | Inter   |
| O(6)-H(6C)···O(5) <sup>v</sup>     | 0.83(7)   | 1.99(8)     | 2.781(15)   | 161(9)    | Inter   |
| O(6)-H(6D)···O(4) <sup>i</sup>     | 0.82(8)   | 2.06(8)     | 2.880(11)   | 175(12)   | Inter   |
| N(8)-H(8A)···O(6) <sup>ii</sup>    | 0.85(8)   | 1.89(9)     | 2.735(12)   | 170(9)    | Inter   |
| N(10)-H(10A)···O(4) <sup>iii</sup> | 0.86(9)   | 2.49(11)    | 3.300(17)   | 158(9)    | Inter   |
| N(10)-H(10A)···N(4) <sup>iii</sup> | 0.86(9)   | 2.25(7)     | 2.901(18)   | 133(8)'   | Inter   |
| N(10)-H(10B)···N(1) <sup>iii</sup> | 0.86(14)  | 2.48(9)     | 2.962(19)   | 117(8)    | Inter   |
| N(10)-H(10B)···N(2)                | 0.86(14)  | 2.46(10)    | 2.836(18)   | 107(7)'   | Intra   |

*i*: -x,1-y,-1/2+z; *ii*: -x,2-y,1/2+z; *iii*: x,1+y,z; *iv*: 1/2+x,1-y,1+z; *v*: x,1+y,-1+z

**Table S7** Bond lengths [Å] and angles [°] of compound **4**·3H<sub>2</sub>O

|           |          |              |          |
|-----------|----------|--------------|----------|
| C(1)-N(2) | 1.331(4) | N(9)-O(4)    | 1.260(3) |
| C(1)-N(6) | 1.380(4) | N(10)-H(10A) | 0.86(3)  |

|                 |          |                     |           |
|-----------------|----------|---------------------|-----------|
| C(1)-N(1)       | 1.380(4) | N(10)-H(10B)        | 0.85(4)   |
| C(2)-N(1)       | 1.326(4) | N(11)-H(11A)        | 0.902(19) |
| C(2)-N(4)       | 1.344(4) | N(11)-H(11B)        | 0.893(19) |
| C(2)-N(3)       | 1.373(4) | N(11)-H(11C)        | 0.902(19) |
| C(3)-N(4)       | 1.343(4) | N(11)-H(11D)        | 0.898(19) |
| C(3)-N(5)       | 1.359(4) | N(12)-H(12A)        | 0.96(4)   |
| C(3)-N(8)       | 1.384(4) | N(12)-H(12B)        | 0.99(4)   |
| C(4)-N(10)      | 1.318(4) | N(12)-H(12C)        | 0.86(4)   |
| C(4)-N(5)       | 1.334(4) | N(12)-H(12D)        | 0.98(5)   |
| C(4)-N(3)       | 1.358(4) | O(5)-H(5E)          | 0.837(18) |
| N(2)-N(3)       | 1.385(4) | O(5)-H(5F)          | 0.827(18) |
| N(6)-N(7)       | 1.318(3) | O(6)-H(6E)          | 0.84(2)   |
| N(7)-O(1)       | 1.257(3) | O(6)-H(6F)          | 0.868(19) |
| N(7)-O(2)       | 1.257(3) | O(7)-H(7E)          | 0.816(18) |
| N(8)-N(9)       | 1.324(4) | O(7)-H(7F)          | 0.827(18) |
| N(9)-O(3)       | 1.244(3) |                     |           |
| N(2)-C(1)-N(6)  | 130.0(3) | N(9)-N(8)-C(3)      | 121.5(3)  |
| N(2)-C(1)-N(1)  | 116.1(3) | O(3)-N(9)-O(4)      | 119.3(3)  |
| N(6)-C(1)-N(1)  | 113.9(3) | O(3)-N(9)-N(8)      | 124.7(3)  |
| N(1)-C(2)-N(4)  | 128.8(3) | O(4)-N(9)-N(8)      | 115.9(3)  |
| N(1)-C(2)-N(3)  | 107.8(3) | C(4)-N(10)-H(10A)   | 120(2)    |
| N(4)-C(2)-N(3)  | 123.4(3) | C(4)-N(10)-H(10B)   | 118(3)    |
| N(4)-C(3)-N(5)  | 126.1(3) | H(10A)-N(10)-H(10B) | 123(4)    |
| N(4)-C(3)-N(8)  | 124.9(3) | H(11A)-N(11)-H(11B) | 110.2(17) |
| N(5)-C(3)-N(8)  | 108.9(3) | H(11A)-N(11)-H(11C) | 108.3(16) |
| N(10)-C(4)-N(5) | 124.3(3) | H(11B)-N(11)-H(11C) | 109.6(17) |
| N(10)-C(4)-N(3) | 118.5(3) | H(11A)-N(11)-H(11D) | 109.7(17) |
| N(5)-C(4)-N(3)  | 117.2(3) | H(11B)-N(11)-H(11D) | 110.3(17) |
| C(2)-N(1)-C(1)  | 104.0(3) | H(11C)-N(11)-H(11D) | 108.7(17) |
| C(1)-N(2)-N(3)  | 99.9(2)  | H(12A)-N(12)-H(12B) | 105(3)    |
| C(4)-N(3)-C(2)  | 120.7(3) | H(12A)-N(12)-H(12C) | 109(4)    |
| C(4)-N(3)-N(2)  | 126.9(3) | H(12B)-N(12)-H(12C) | 110(4)    |
| C(2)-N(3)-N(2)  | 112.2(3) | H(12A)-N(12)-H(12D) | 111(3)    |
| C(3)-N(4)-C(2)  | 112.9(3) | H(12B)-N(12)-H(12D) | 117(3)    |
| C(4)-N(5)-C(3)  | 119.4(3) | H(12C)-N(12)-H(12D) | 105(4)    |
| N(7)-N(6)-C(1)  | 118.0(2) | H(5E)-O(5)-H(5F)    | 102(3)    |

|                |          |                  |        |
|----------------|----------|------------------|--------|
| O(1)-N(7)-O(2) | 119.6(3) | H(6E)-O(6)-H(6F) | 98(3)  |
| O(1)-N(7)-N(6) | 116.0(3) | H(7E)-O(7)-H(7F) | 107(3) |
| O(2)-N(7)-N(6) | 124.4(3) |                  |        |

**Table S8** Hydrogen bonds of compound **4**·3H<sub>2</sub>O [Å and °]

| D-H···A                                 | d(D-H)/ Å | d(H···A)/ Å | d(D···A)/ Å | <(DHA)/ ° | comment |
|-----------------------------------------|-----------|-------------|-------------|-----------|---------|
| O(5)-H(5E)···O(7)                       | 0.84(3)   | 2.06(3)     | 2.814(4)    | 150(4)    | Inter   |
| O(5)-H(5F)···N(1) <sup>iii</sup>        | 0.83(3)   | 2.00(3)     | 2.821(4)    | 173(3)    | Inter   |
| O(6)-H(6E)···O(4) <sup>iii</sup>        | 0.84(3)   | 2.43(5)     | 2.949(4)    | 121(5)    | Inter   |
| O(6)-H(6E)···O(1) <sup>v</sup>          | 0.84(3)   | 2.27(5)     | 2.965(4)    | 141(5)'   | Inter   |
| O(6)-H(6F)···O(7) <sup>iv</sup>         | 0.87(3)   | 2.46(3)     | 3.271(4)    | 156(3)    | Inter   |
| O(7)-H(7E)···N(5) <sup>vi</sup>         | 0.82(3)   | 2.01(3)     | 2.814(4)    | 169(4)    | Inter   |
| O(7)-H(7F)···O(5) <sup>vii</sup>        | 0.82(3)   | 2.12(3)     | 2.932(4)    | 167(3)    | Inter   |
| N(10)-H(10A)···O(6) <sup>i</sup>        | 0.86(4)   | 2.01(4)     | 2.861(5)    | 167(3)    | Inter   |
| N(10)-H(10B)···N(2)                     | 0.85(4)   | 2.47(4)     | 2.821(4)    | 106(3)    | Intra   |
| N(10)-H(10B)···O(2) <sup>i</sup>        | 0.85(4)   | 2.10(4)     | 2.922(4)    | 163(3)'   | Inter   |
| N(11)-H(11A)···O(5) <sup>i</sup>        | 0.90(2)   | 2.06(2)     | 2.936(4)    | 164(2)    | Inter   |
| N(11)-<br>H(11B)···O(3) <sup>viii</sup> | 0.89(3)   | 2.22(2)     | 2.841(4)    | 127(2)    | Inter   |
| N(11)-<br>H(11B)···N(4) <sup>viii</sup> | 0.89(3)   | 2.14(3)     | 2.973(4)    | 157(2)'   | Inter   |
| N(11)-H(11C)···O(2)                     | 0.90(2)   | 2.33(2)     | 2.972(4)    | 128(2)    | Inter   |
| N(11)-H(11C)···O(2) <sup>i</sup>        | 0.90(2)   | 2.21(3)     | 2.918(4)    | 135(2)'   | Inter   |
| N(11)-H(11C)···N(2) <sup>i</sup>        | 0.90(2)   | 2.57(2)     | 3.215(4)    | 129(2)''  | Inter   |
| N(11)-H(11D)···O(3) <sup>ii</sup>       | 0.90(3)   | 2.03(3)     | 2.921(4)    | 174(3)    | Inter   |
| N(11)-H(11D)···O(4) <sup>ii</sup>       | 0.90(3)   | 2.51(3)     | 3.167(4)    | 131(2)'   | Inter   |
| N(11)-H(11D)···N(9) <sup>ii</sup>       | 0.90(3)   | 2.61(3)     | 3.462(4)    | 158(2)''  | Inter   |
| N(12)-H(12A)···N(8) <sup>ix</sup>       | 0.96(4)   | 2.00(4)     | 2.944(4)    | 168(3)    | Inter   |
| N(12)-H(12B)···O(7) <sup>iii</sup>      | 0.99(4)   | 1.84(4)     | 2.821(4)    | 172(3)    | Inter   |
| N(12)-H(12C)···N(6)                     | 0.86(4)   | 2.10(4)     | 2.923(4)    | 162(4)    | Inter   |
| N(12)-H(12D)···O(4) <sup>ii</sup>       | 0.98(4)   | 2.18(4)     | 2.975(4)    | 138(3)    | Inter   |
| N(12)-H(12D)···O(1) <sup>x</sup>        | 0.98(4)   | 2.34(4)     | 2.865(4)    | 113(3)'   | Inter   |

*i*: 1-x, 1-y, 1-z; *ii*: -x, 1-y, -z; *iii*: -x, 1-y, 1-z; *iv*: 1-x, 1-y, 2-z; *v*: x, 3/2-y, 1/2+z; *vi*: x, y, 1+z; *vii*: x, 1/2-y, 1/2+z; *viii*: 1+x, y, z; *ix*: -x, 1/2+y, 1/2-z; *x*: x, 3/2-y, -1/2+z

### 3. Mass spectra of compound 2

20171031 2 #224 RT: 2.86 AV: 1 NL: 7.78E5  
T: - c Q1MS [ 30.00-500.00]

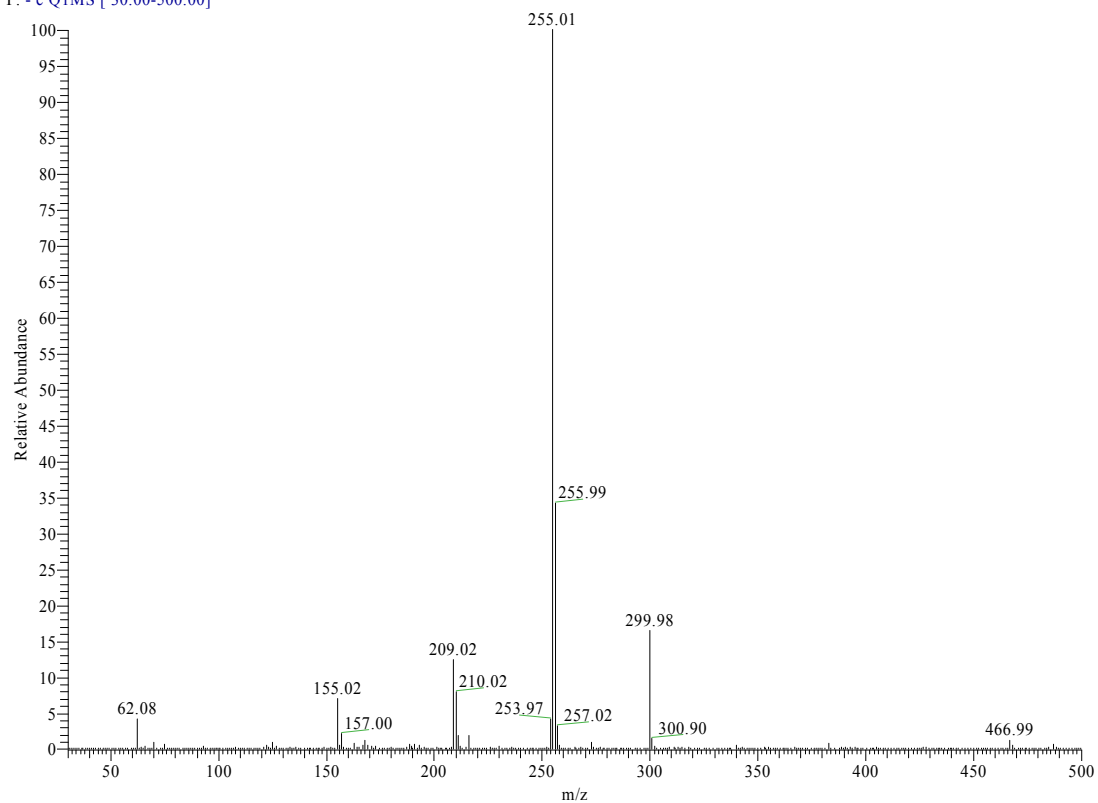

Fig. S5 Mass spectrum of 2

#### 4. $^1\text{H}$ NMR and $^{13}\text{C}$ NMR spectra

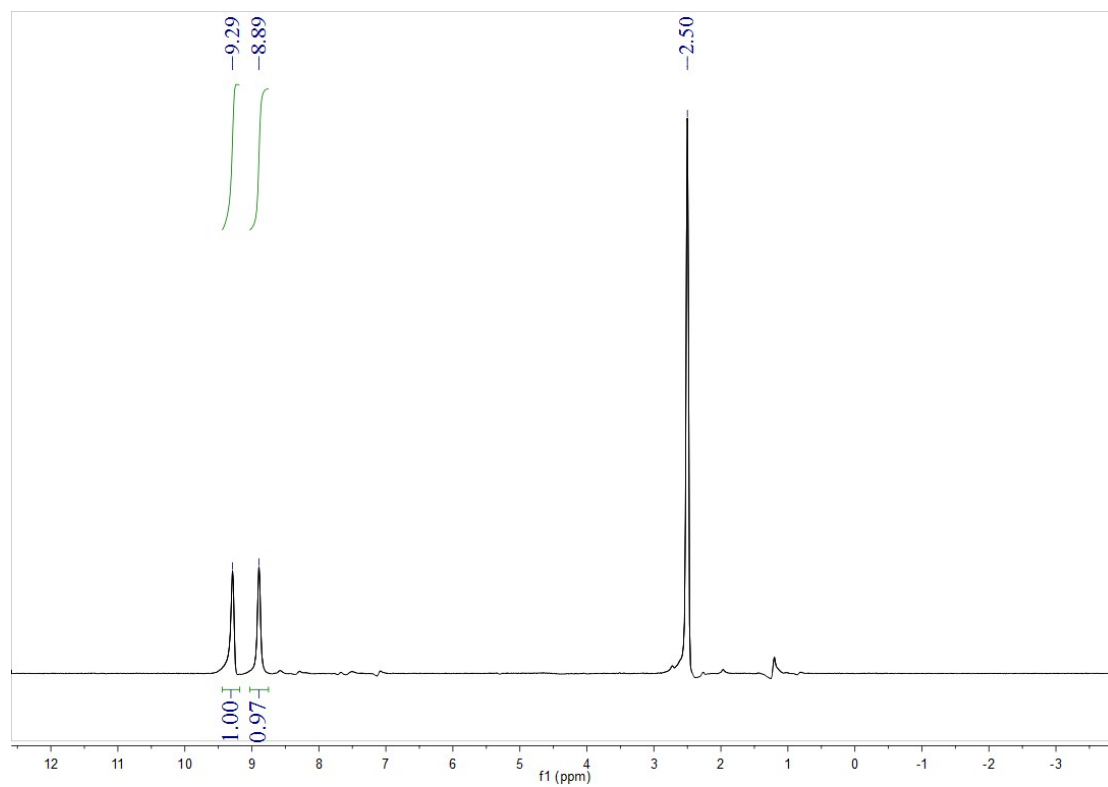

**Fig. S6**  $^1\text{H}$ -NMR spectra (300 MHz) of **2** in  $\text{DMSO-}d_6$  at  $25^\circ\text{C}$

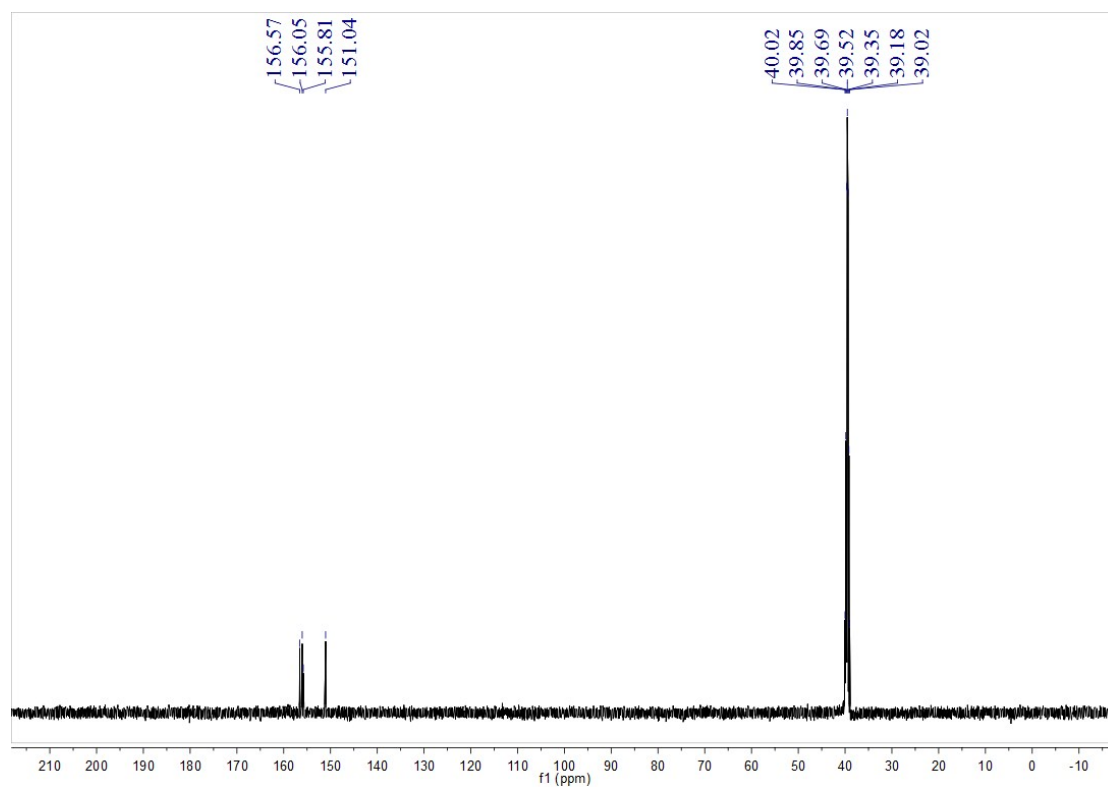

Fig. S7  $^{13}\text{C}$ -NMR spectra (126 MHz) of **2** in  $\text{DMSO-}d_6$  at  $25^\circ\text{C}$

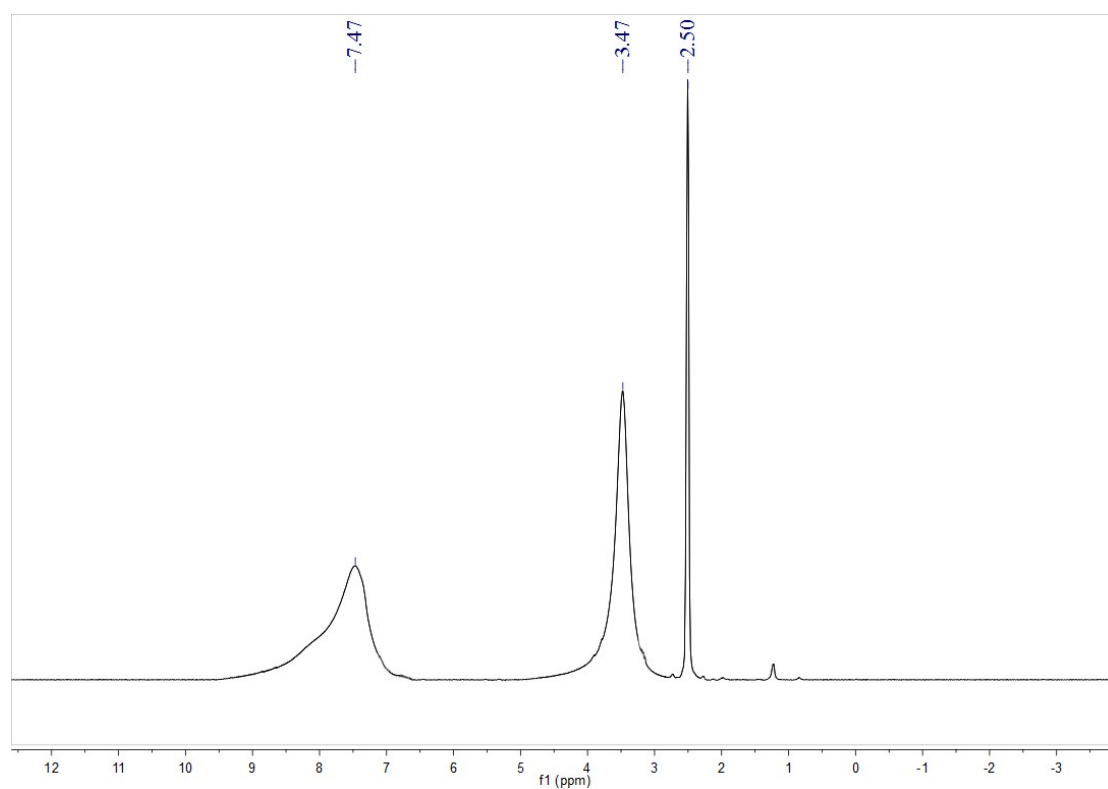

Fig. S8  $^1\text{H}$ -NMR spectra (300 MHz) of **4** in  $\text{DMSO-}d_6$  at  $25^\circ\text{C}$

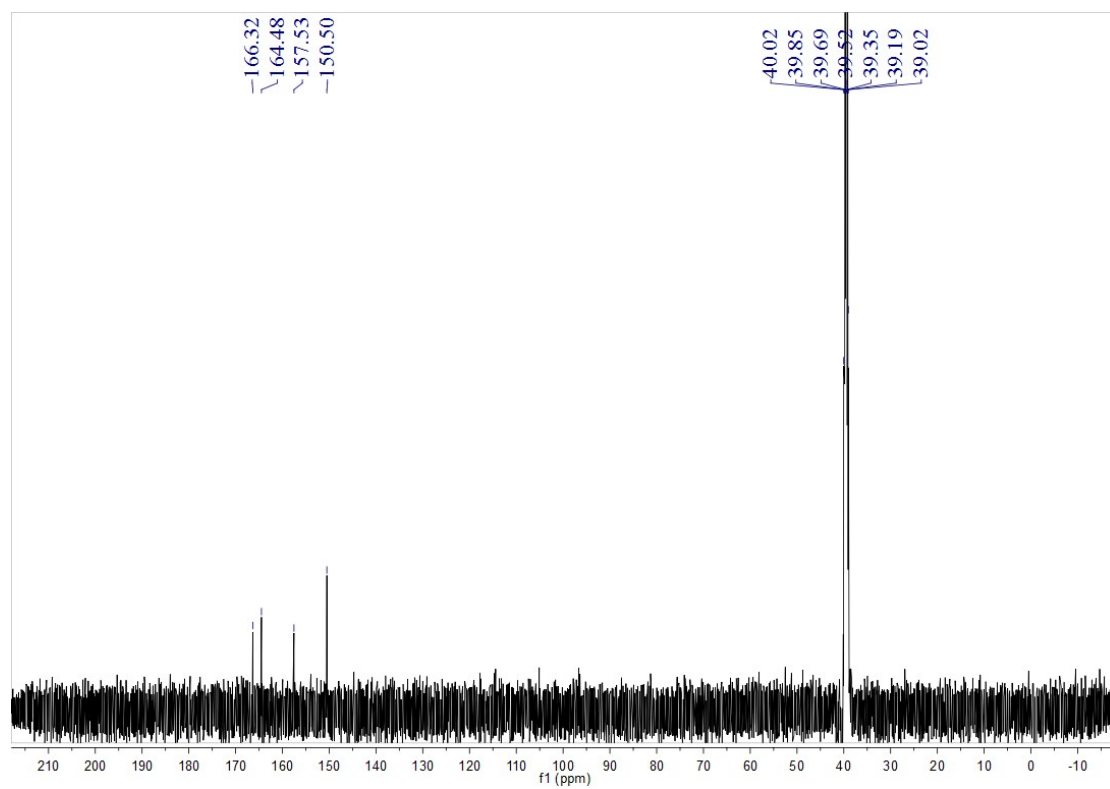

**Fig. S9**  $^{13}\text{C}$ -NMR spectra (126 MHz) of **4** in  $\text{DMSO-}d_6$  at  $25^\circ\text{C}$

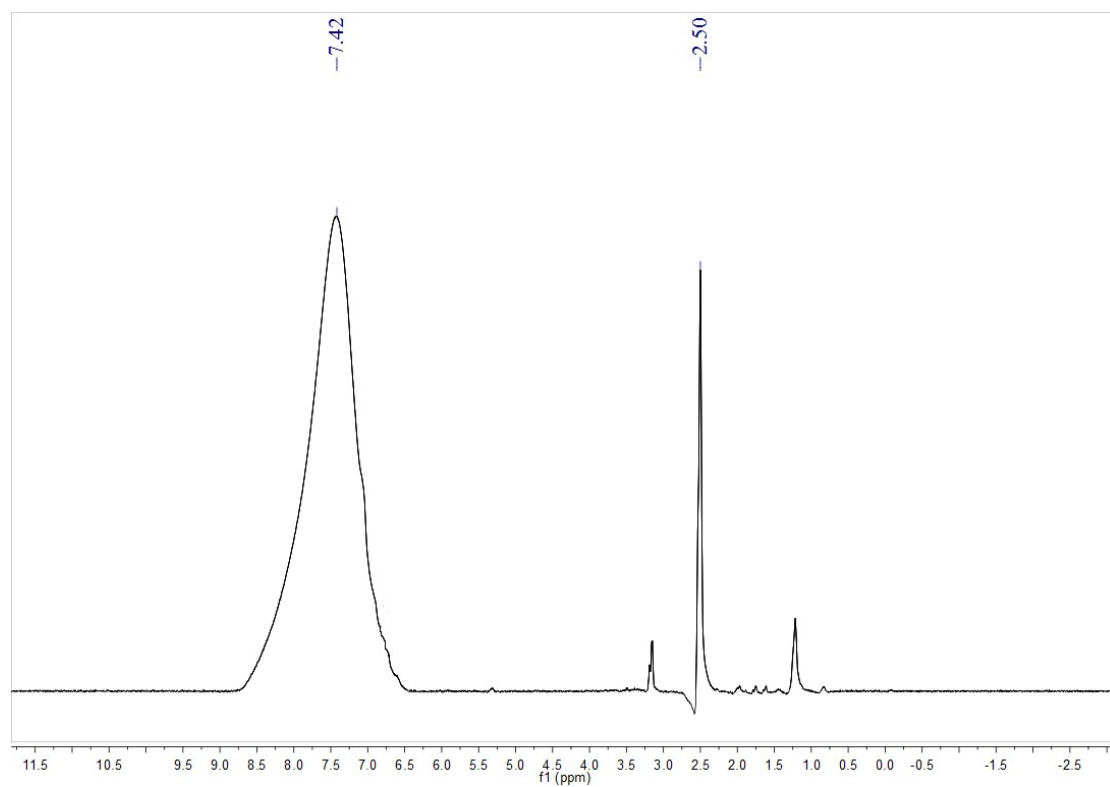

**Fig. S10**  $^1\text{H}$ -NMR spectra (300 MHz) of **5** in  $\text{DMSO-}d_6$  at  $25^\circ\text{C}$



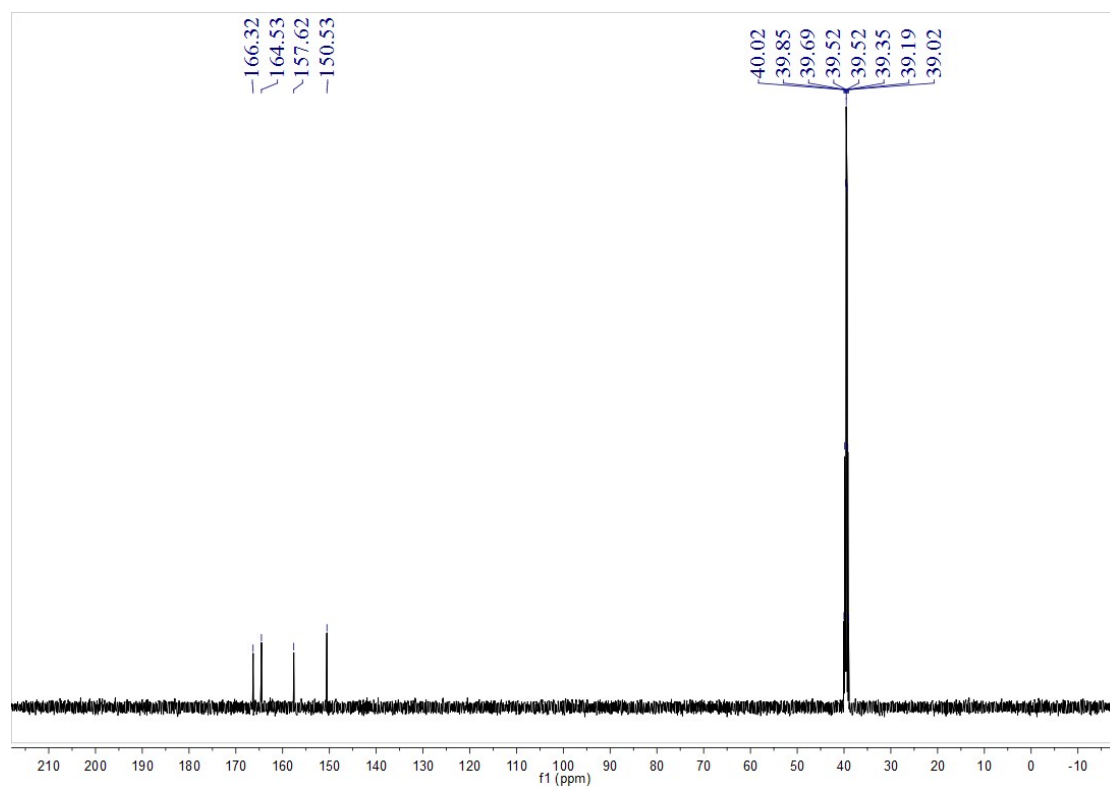

**Fig. S11**  $^{13}\text{C}$ -NMR spectra (126 MHz) of **5** in  $\text{DMSO-}d_6$  at  $25^\circ\text{C}$

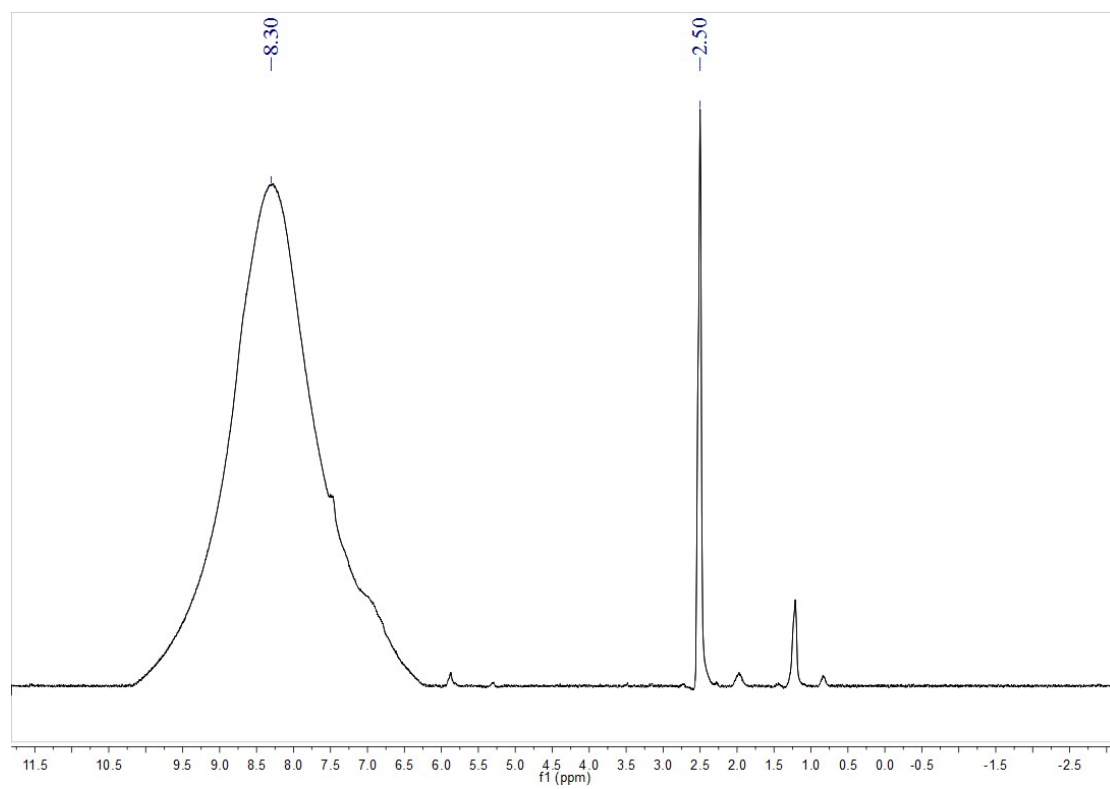

**Fig. S12**  $^1\text{H}$ -NMR spectra (300 MHz) of **6** in  $\text{DMSO-}d_6$  at  $25^\circ\text{C}$

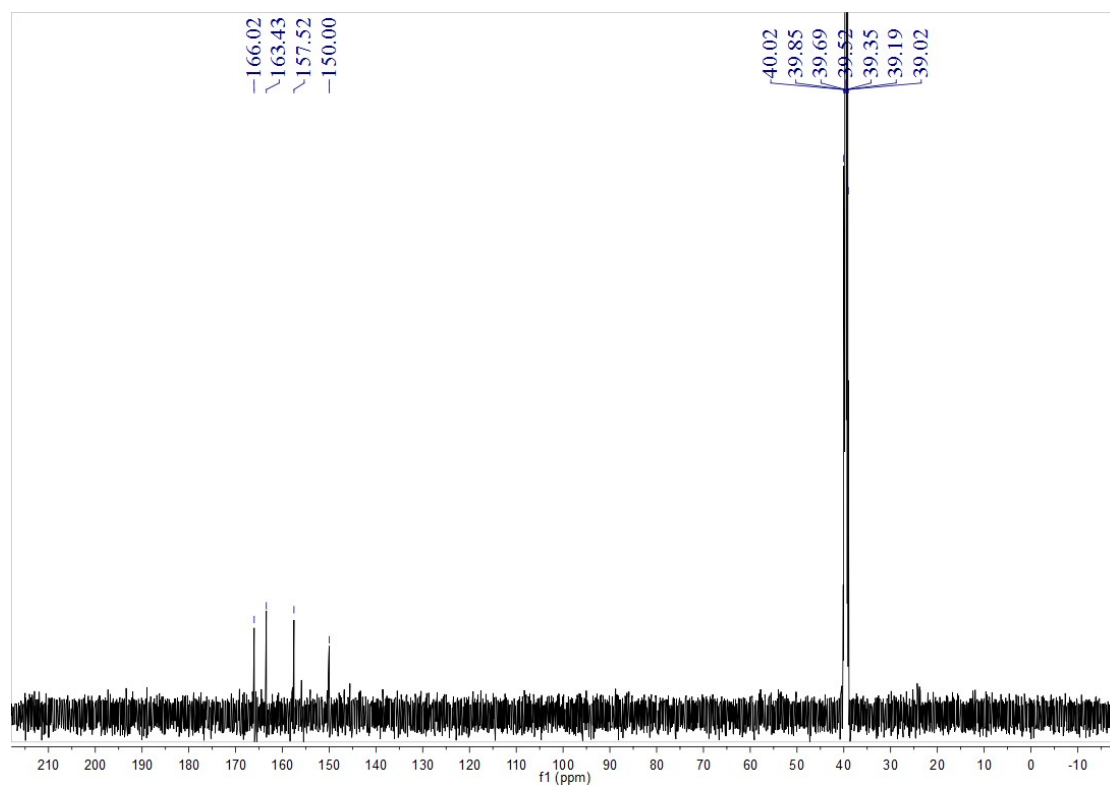

Fig. S13  $^{13}\text{C}$ -NMR spectra (126 MHz) of **6** in  $\text{DMSO-}d_6$  at  $25^\circ\text{C}$

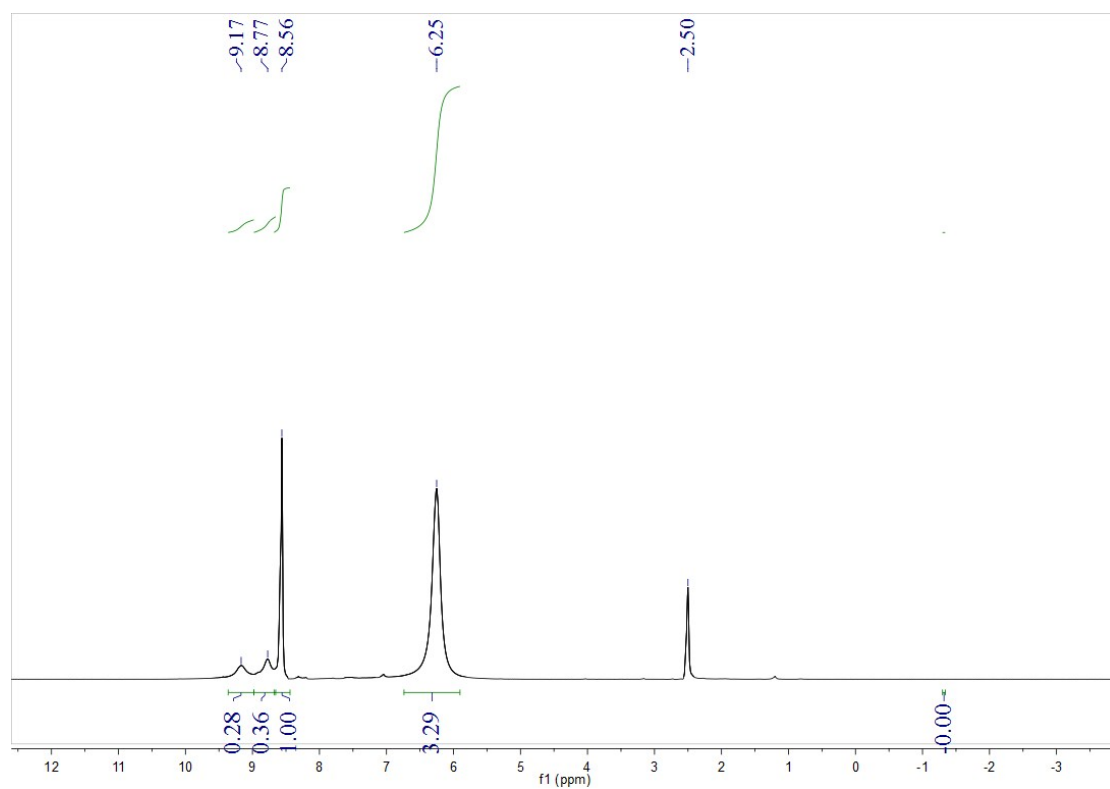

Fig. S14  $^1\text{H}$ -NMR spectra (300 MHz) of **7** in  $\text{DMSO-}d_6$  at  $25^\circ\text{C}$

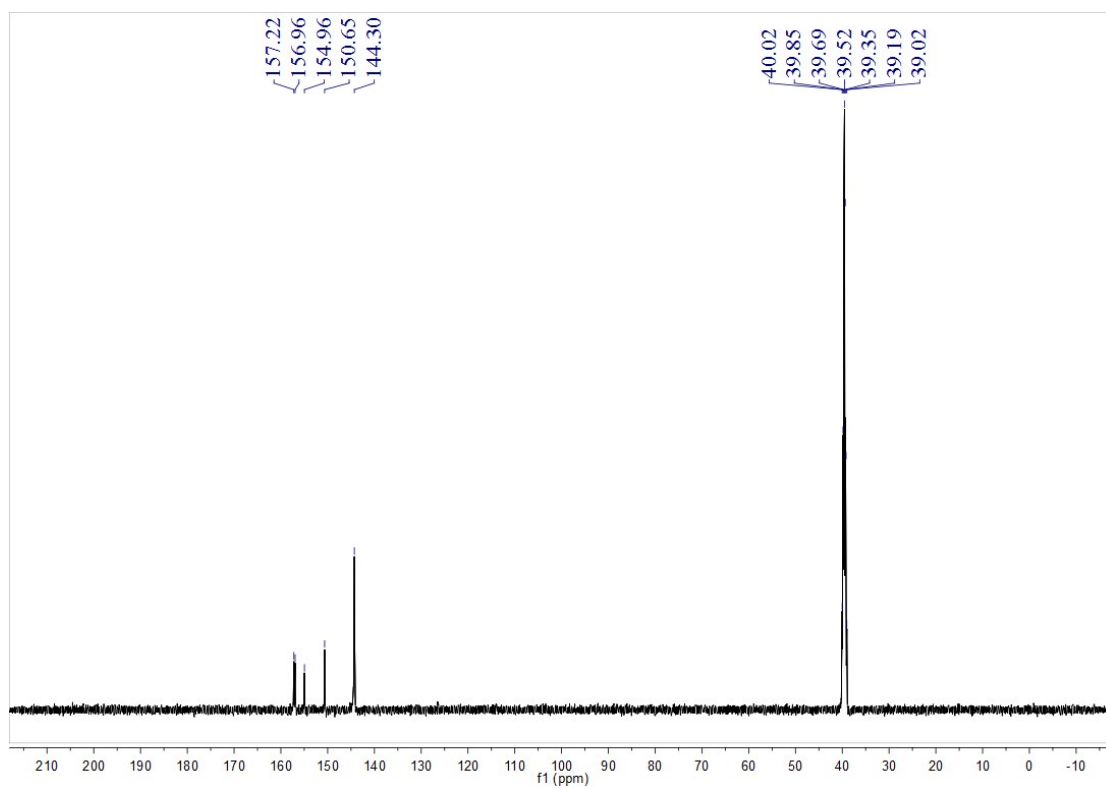

**Fig. S15**  $^{13}\text{C-NMR}$  spectra (126 MHz) of **7** in  $\text{DMSO-}d_6$  at  $25^\circ\text{C}$

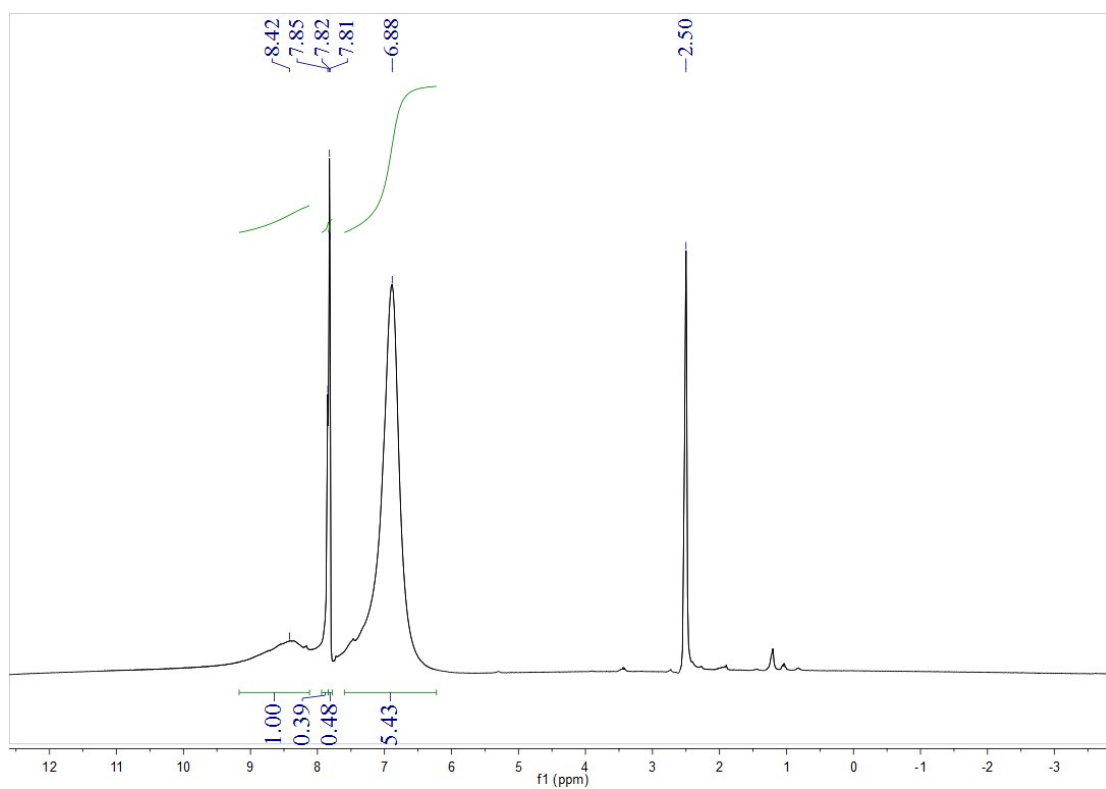

**Fig. S16**  $^1\text{H-NMR}$  spectra (300 MHz) of **8** in  $\text{DMSO-}d_6$  at  $25^\circ\text{C}$

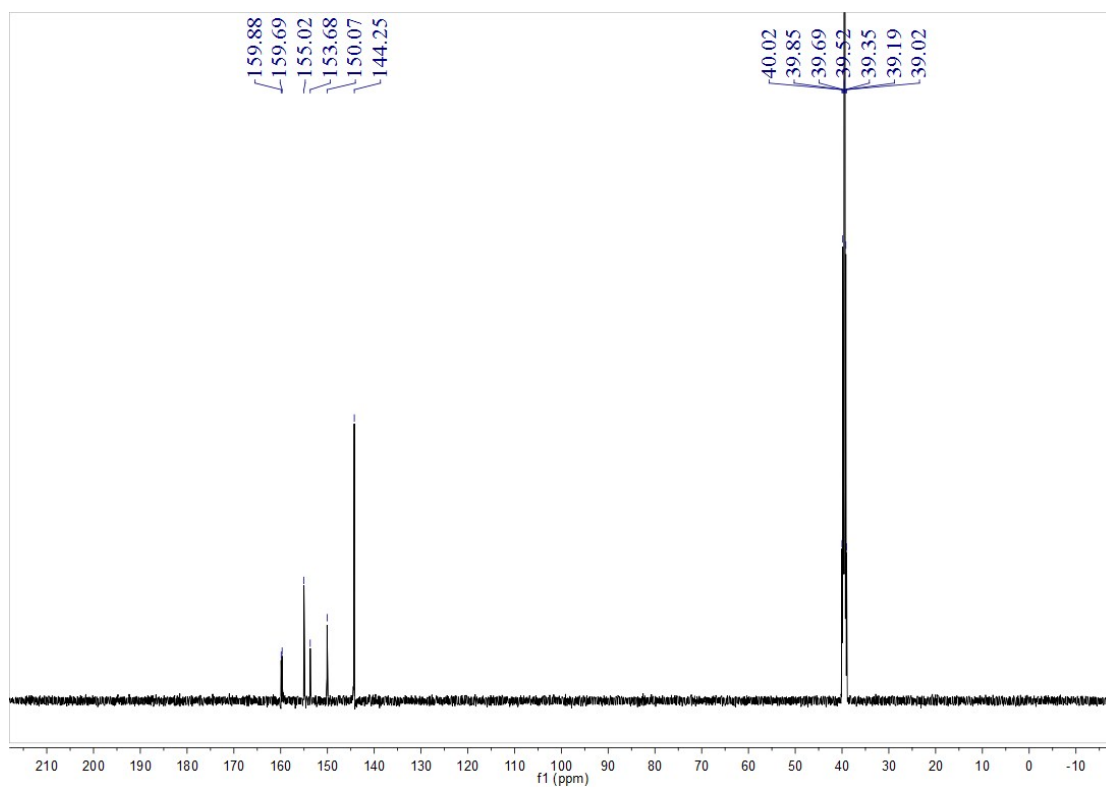

Fig. S17  $^{13}\text{C}$ -NMR spectra (126 MHz) of **8** in  $\text{DMSO-}d_6$  at  $25^\circ\text{C}$

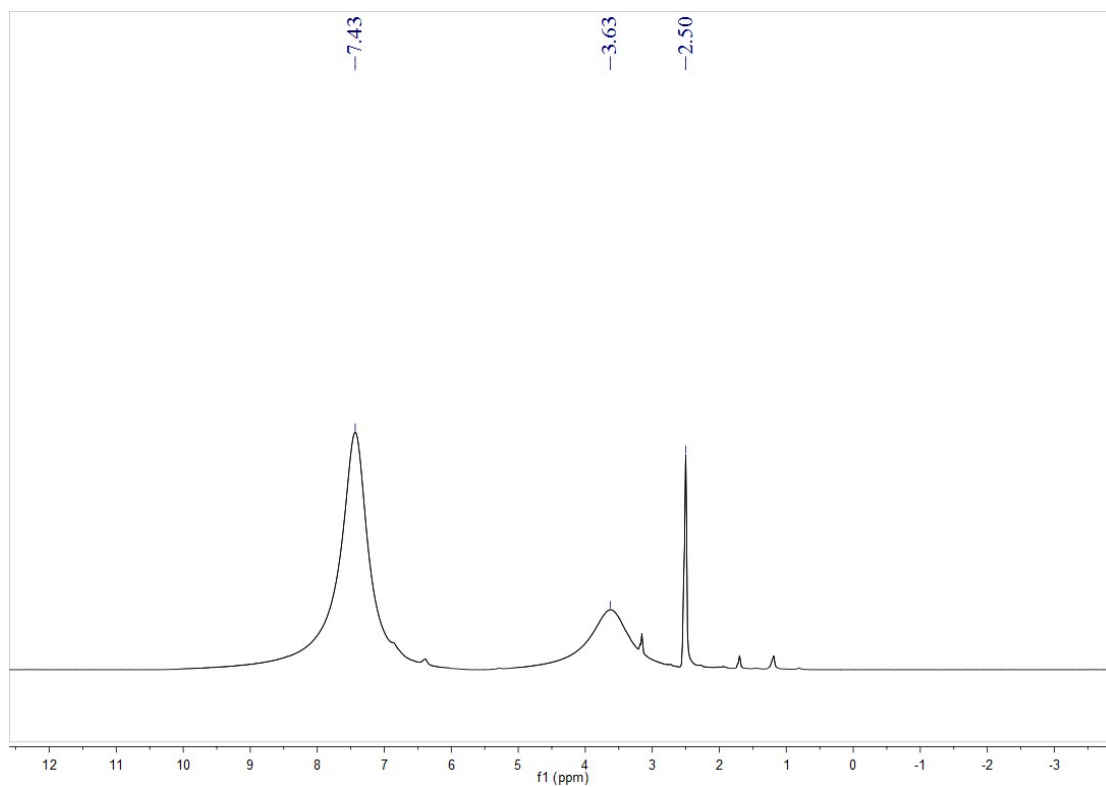

Fig. S18  $^1\text{H}$ -NMR spectra (300 MHz) of **9** in  $\text{DMSO-}d_6$  at  $25^\circ\text{C}$

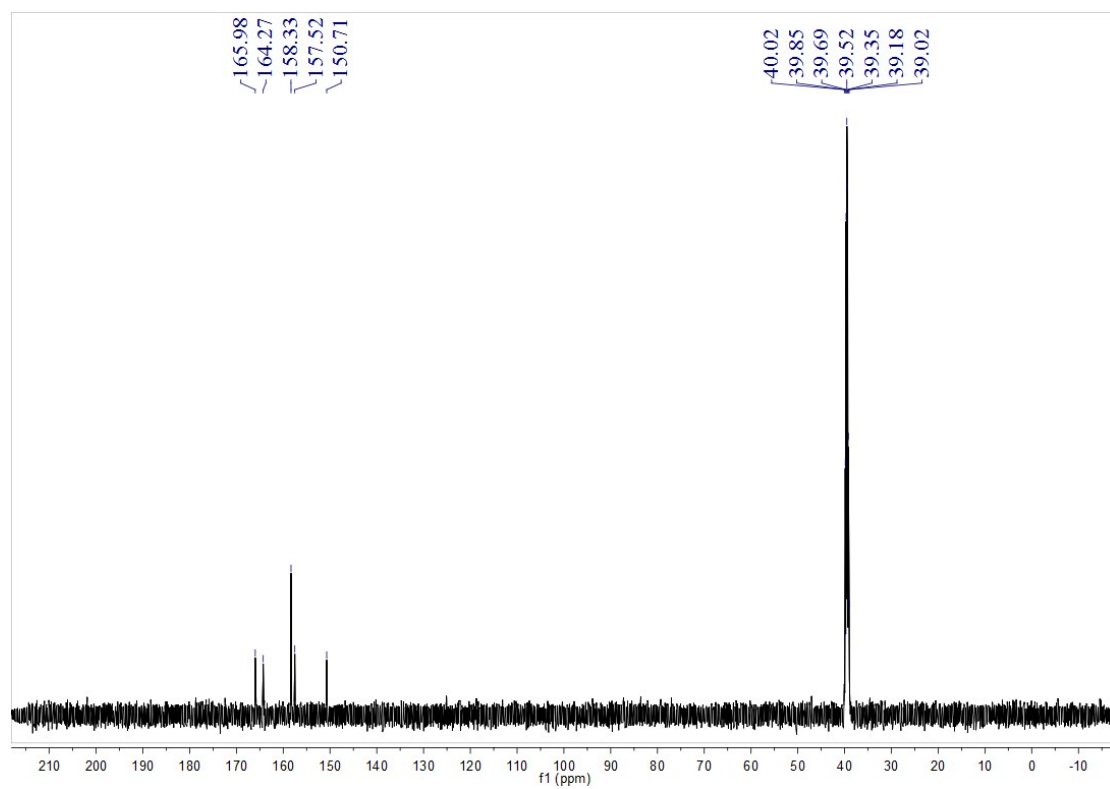

**Fig. S19**  $^{13}\text{C}$ -NMR spectra (126 MHz) of **9** in  $\text{DMSO-}d_6$  at  $25^\circ\text{C}$

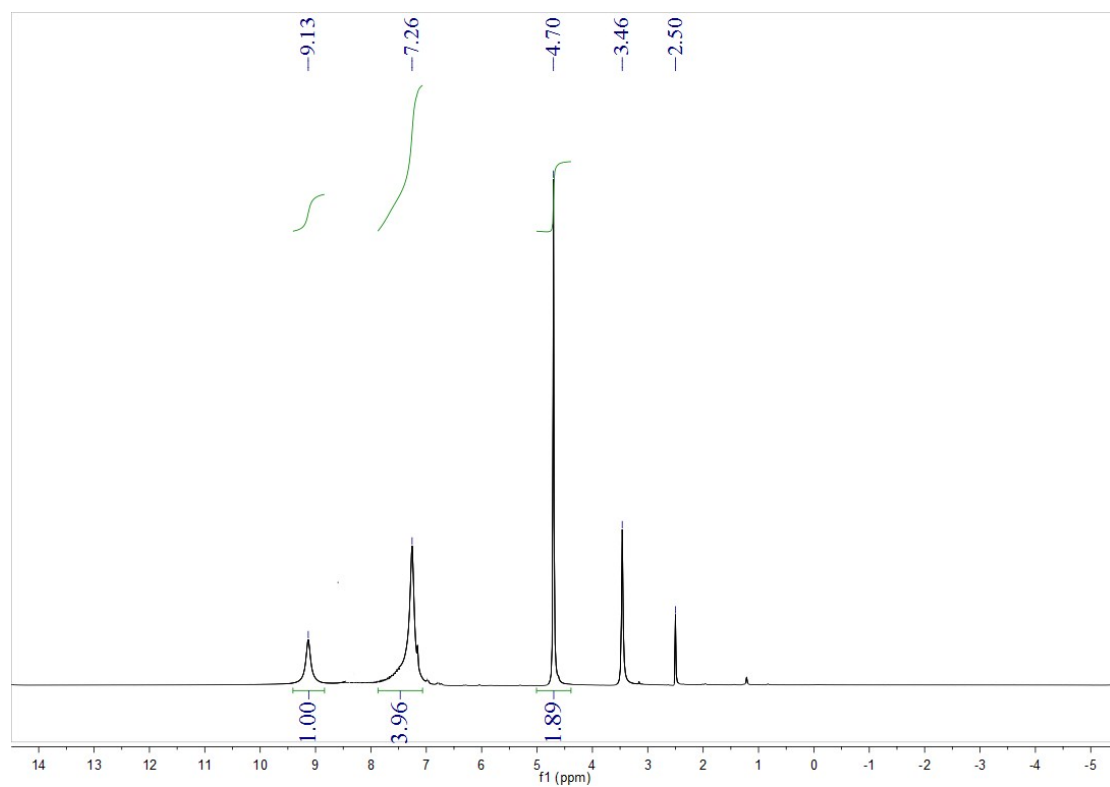

**Fig. S20**  $^1\text{H}$ -NMR spectra (300 MHz) of **11** in  $\text{DMSO-}d_6$  at  $25^\circ\text{C}$

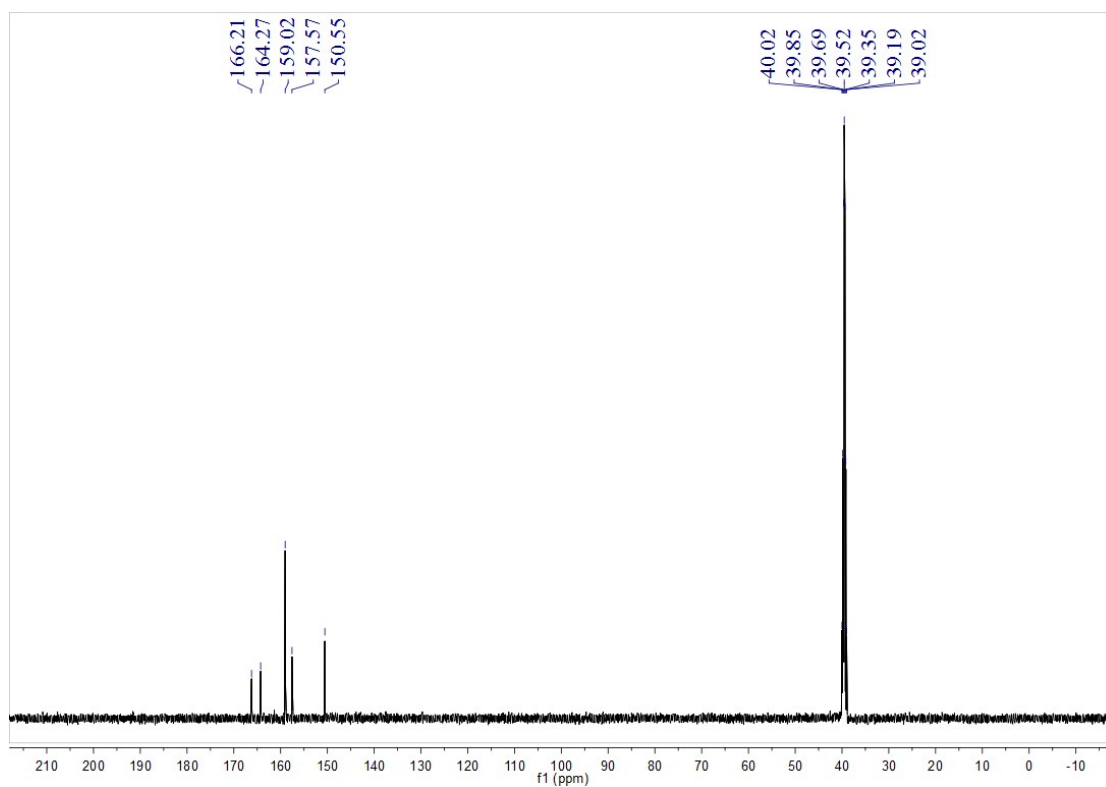

Fig. S21  $^{13}\text{C}$ -NMR spectra (126 MHz) of **11** in  $\text{DMSO-}d_6$  at  $25^\circ\text{C}$

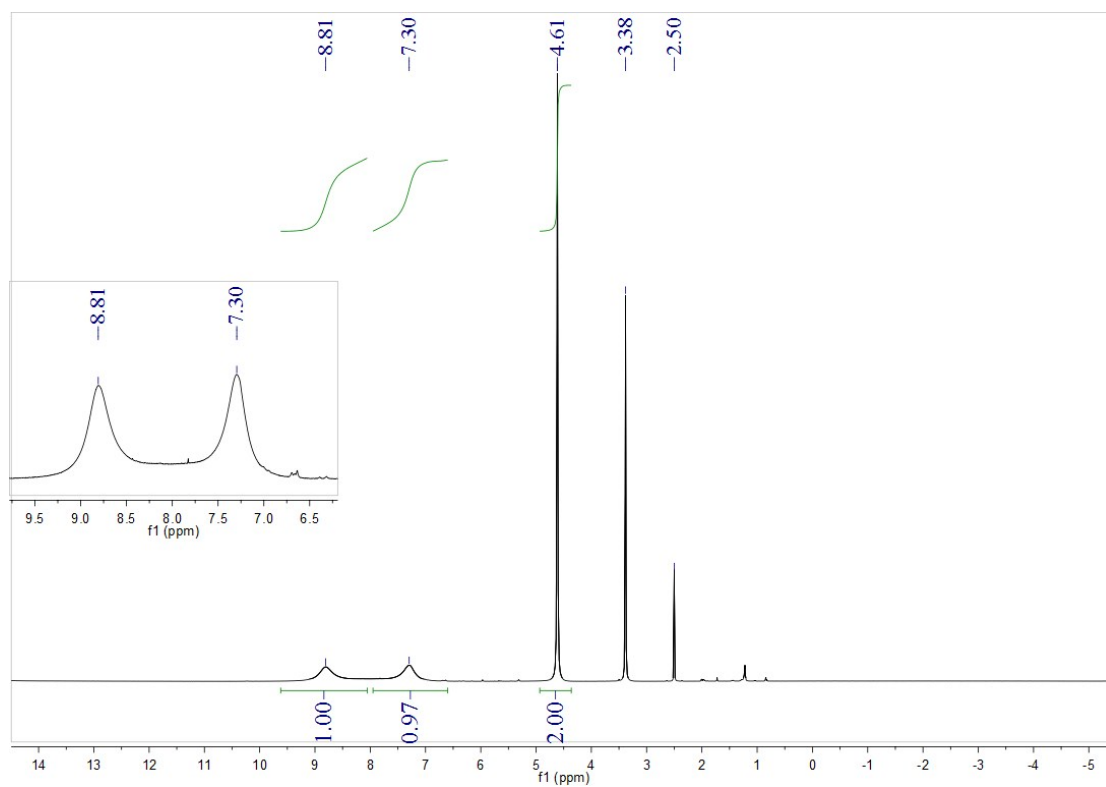

Fig. S22  $^1\text{H}$ -NMR spectra (300 MHz) of **12** in  $\text{DMSO-}d_6$  at  $25^\circ\text{C}$

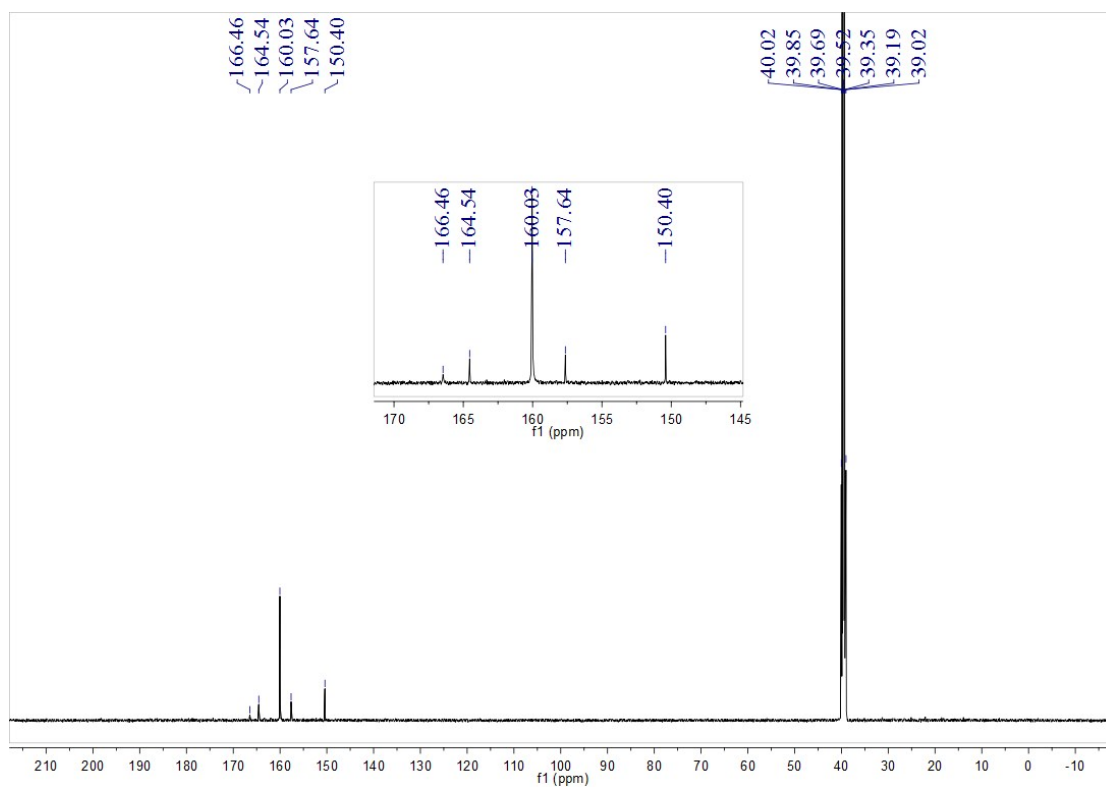

Fig. S23  $^{13}\text{C}$ -NMR spectra (126 MHz) of **12** in  $\text{DMSO-}d_6$  at  $25^\circ\text{C}$

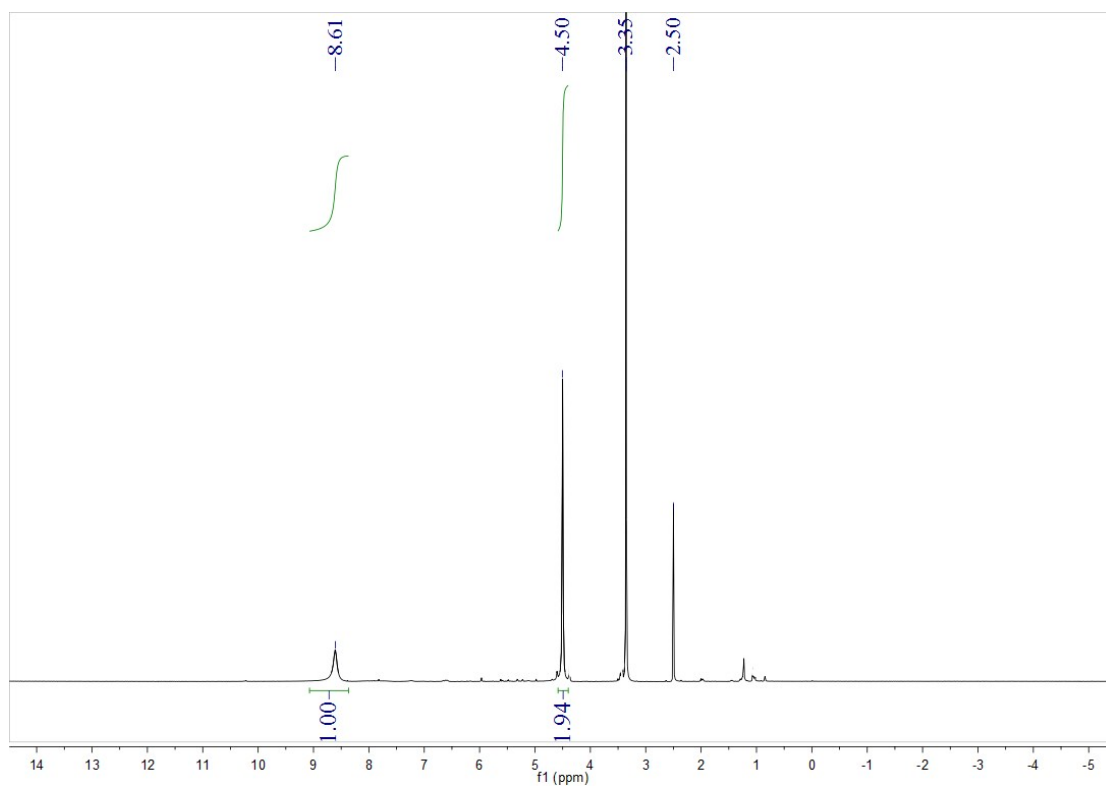

Fig. S24  $^1\text{H}$ -NMR spectra (300 MHz) of **13** in  $\text{DMSO-}d_6$  at  $25^\circ\text{C}$

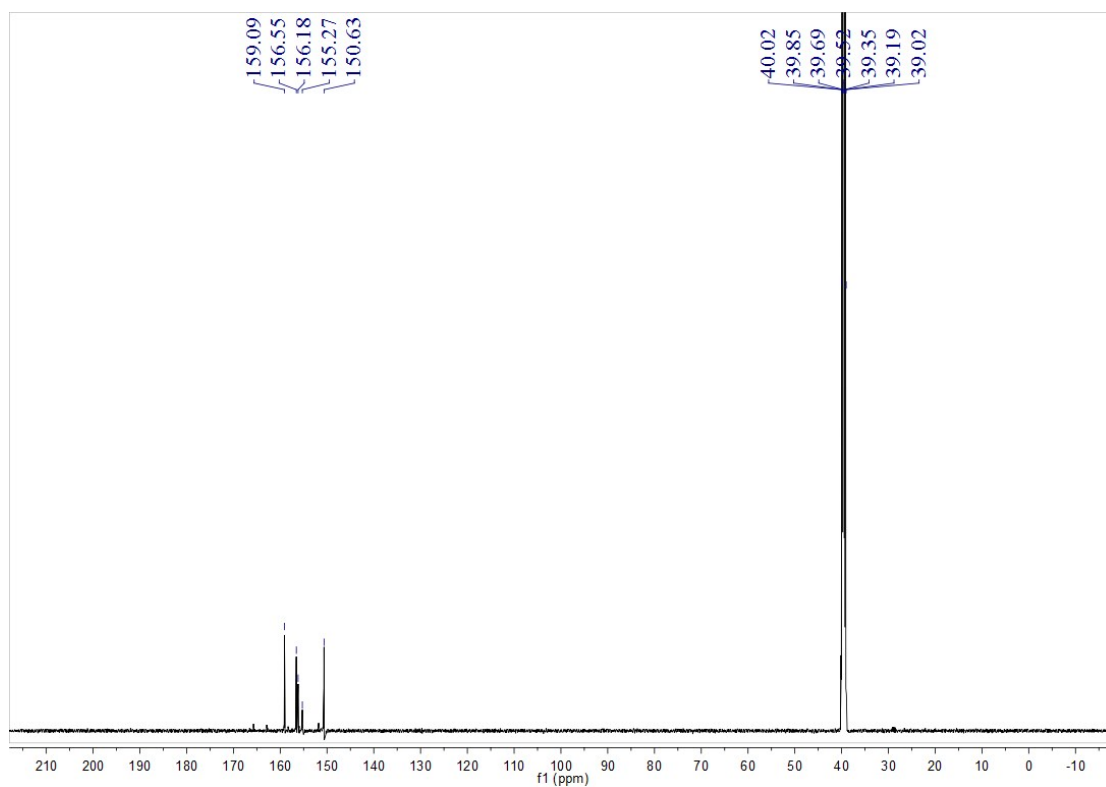

Fig. S25  $^{13}\text{C}$ -NMR spectra (126 MHz) of **13** in  $\text{DMSO-}d_6$  at  $25^\circ\text{C}$

## 5. Differential scanning calorimetry (DSC) curves

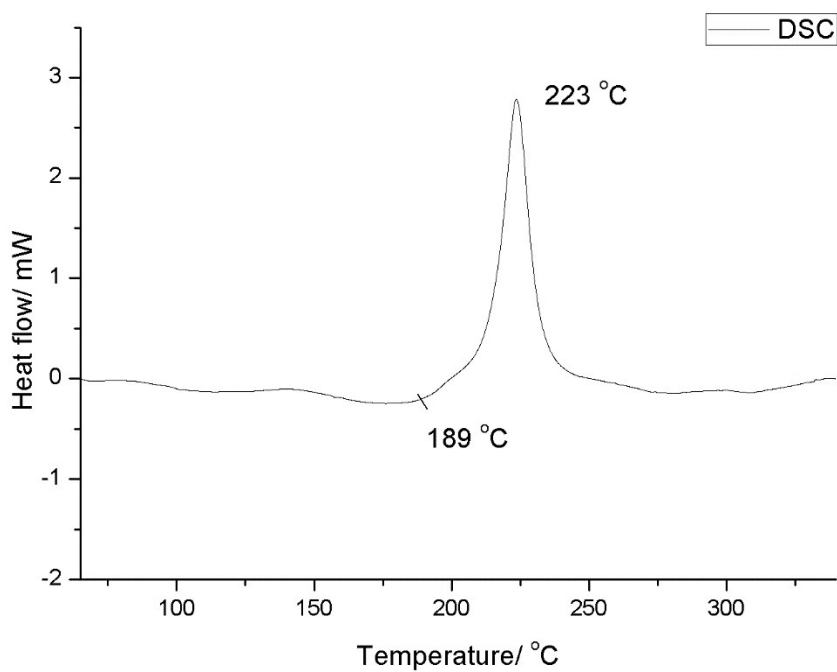

Fig. S26 DSC curves of **2** under nitrogen with a heating rate of  $5^\circ\text{C min}^{-1}$ .



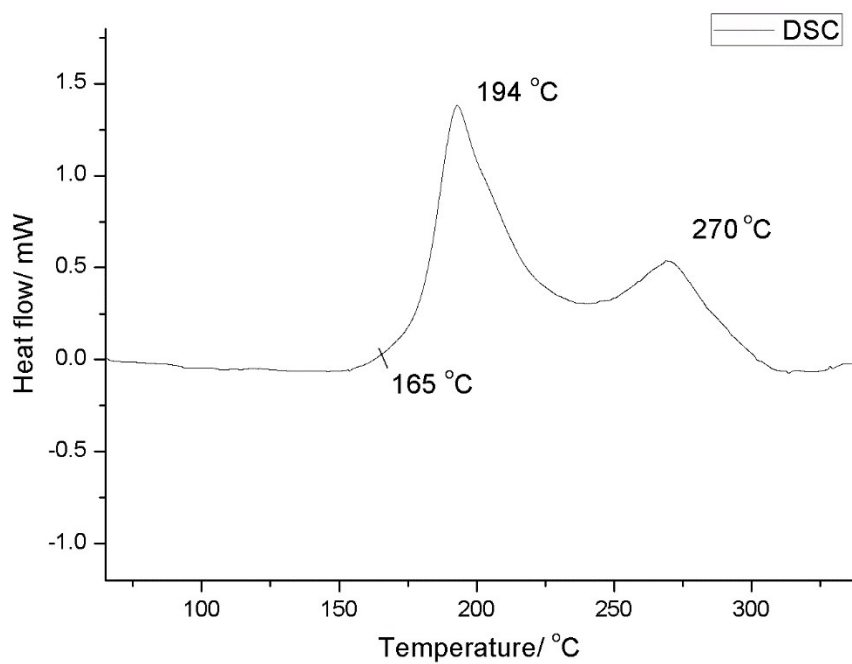

Fig. S27 DSC curves of **4** under nitrogen with a heating rate of 5 °C min<sup>-1</sup>.

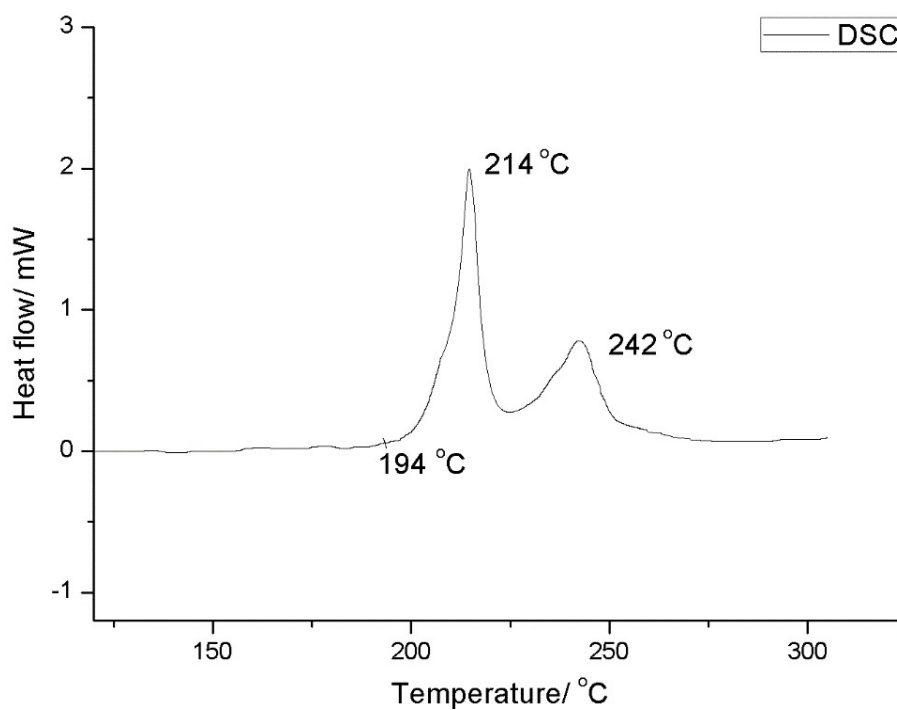

Fig. S28 DSC curves of **5** under nitrogen with a heating rate of 5 °C min<sup>-1</sup>.

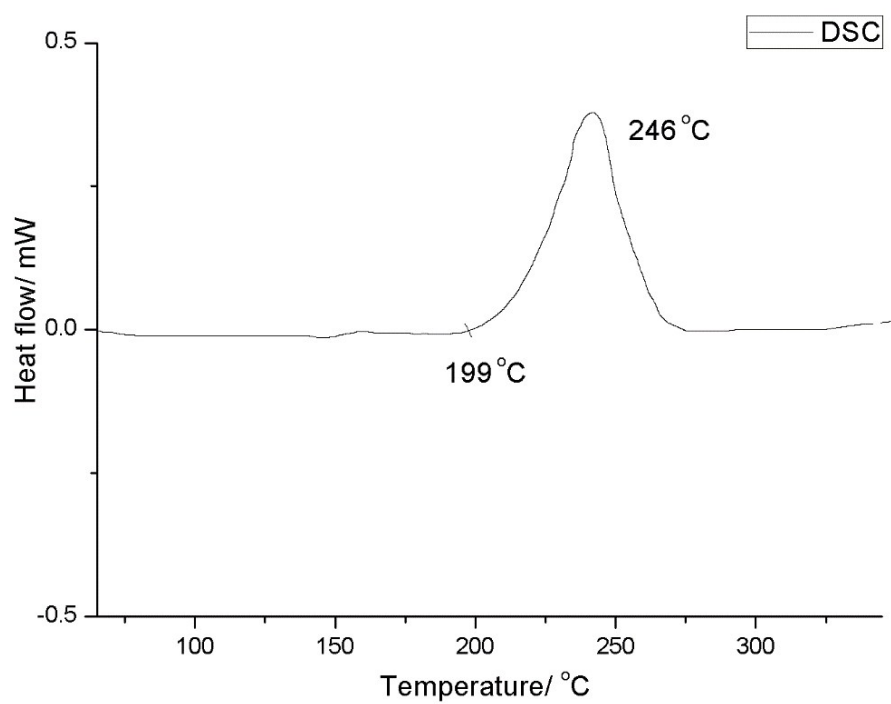

Fig. S29 DSC curves of **6** under nitrogen with a heating rate of 5 °C min<sup>-1</sup>.

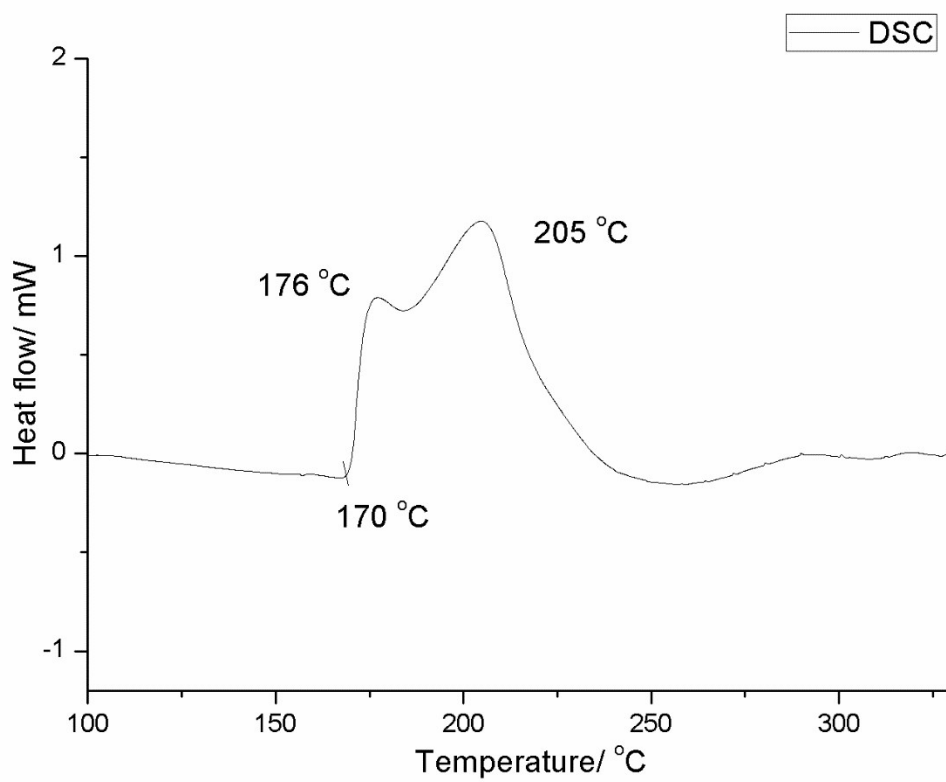

Fig. S30 DSC curves of **7** under nitrogen with a heating rate of 5 °C min<sup>-1</sup>.

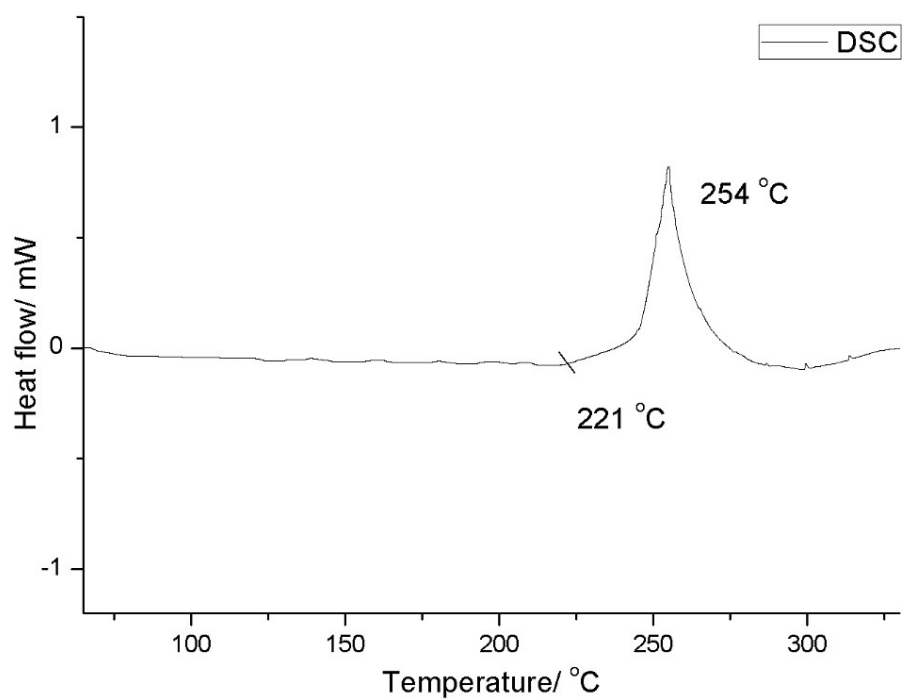

Fig. S31 DSC curves of **8** under nitrogen with a heating rate of 5 °C min<sup>-1</sup>.

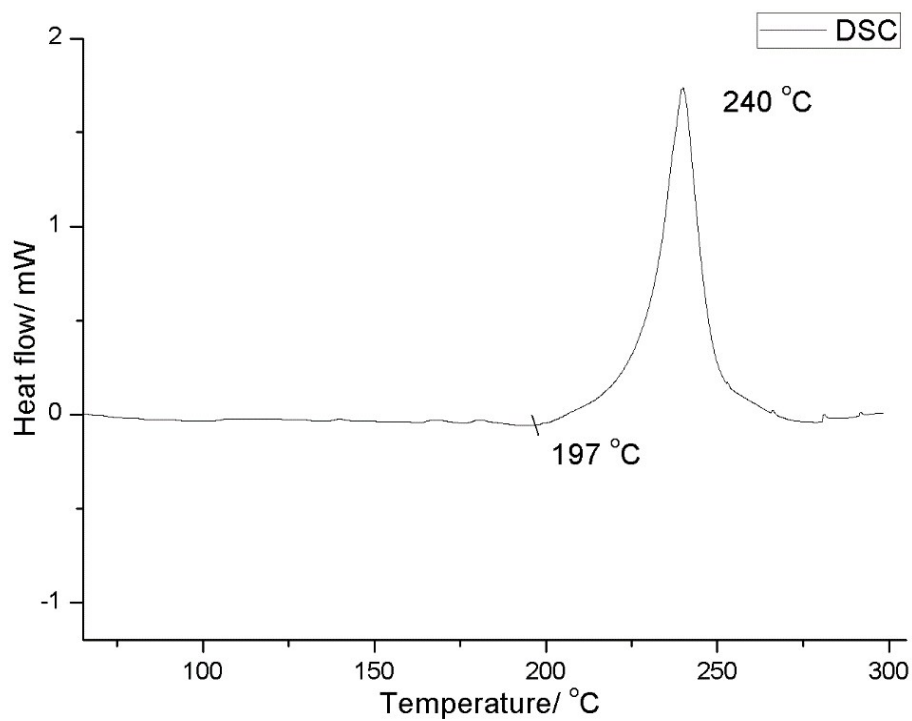

Fig. S32 DSC curves of **9** under nitrogen with a heating rate of 5 °C min<sup>-1</sup>.

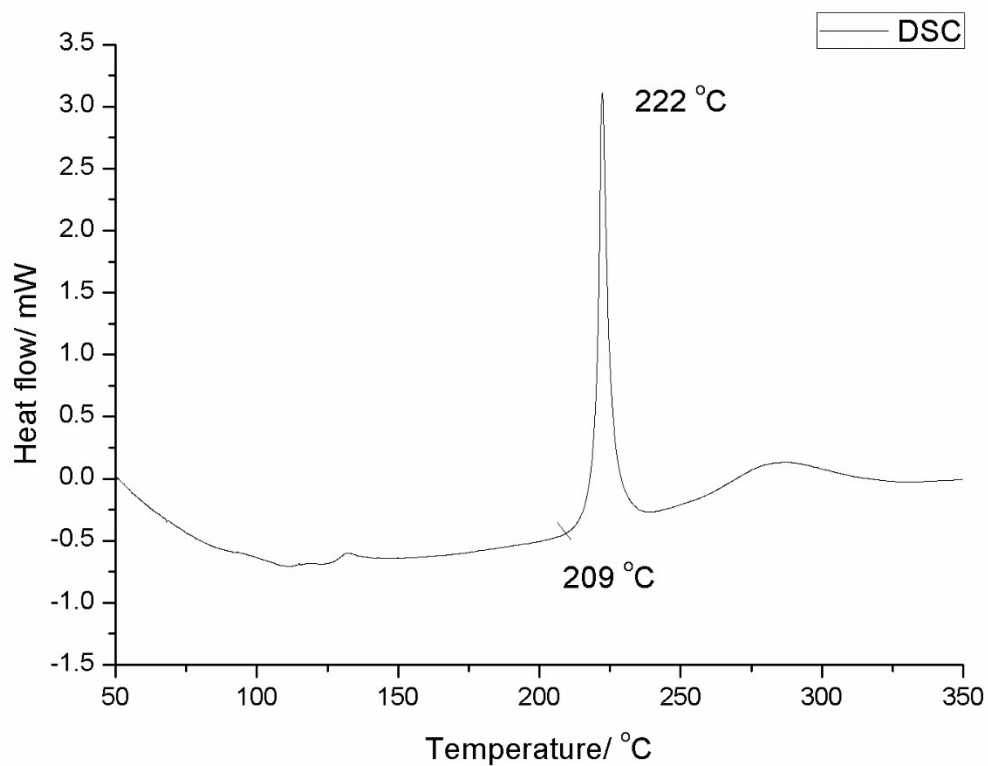

Fig. S33 DSC curves of **11** under nitrogen with a heating rate of 5 °C min<sup>-1</sup>.

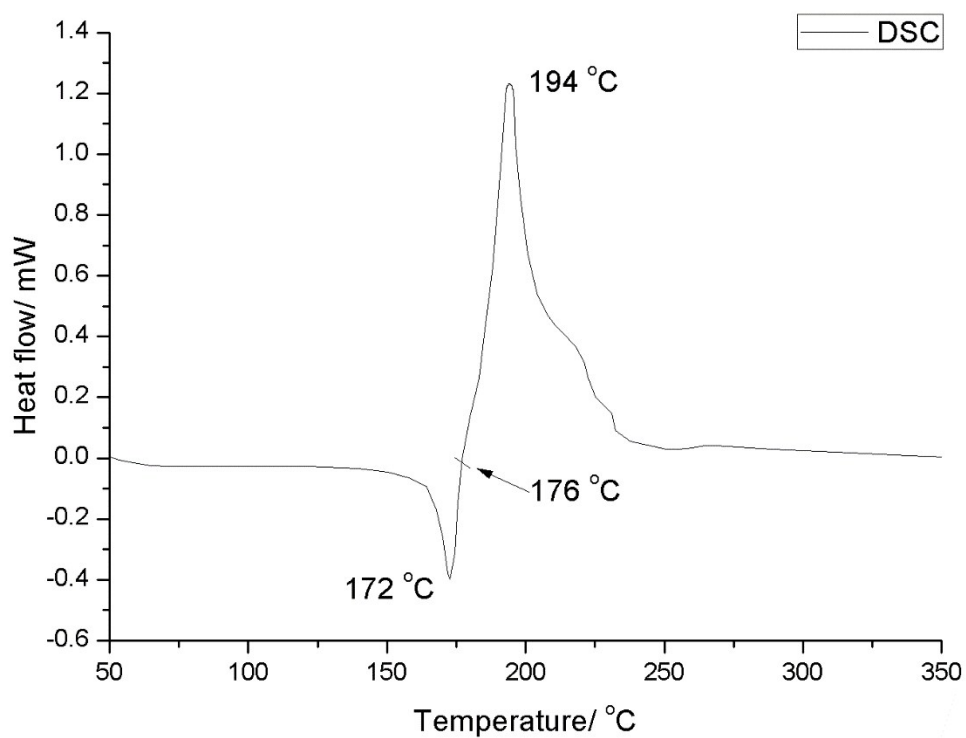

Fig. S34 DSC curves of **12** under nitrogen with a heating rate of 5 °C min<sup>-1</sup>.

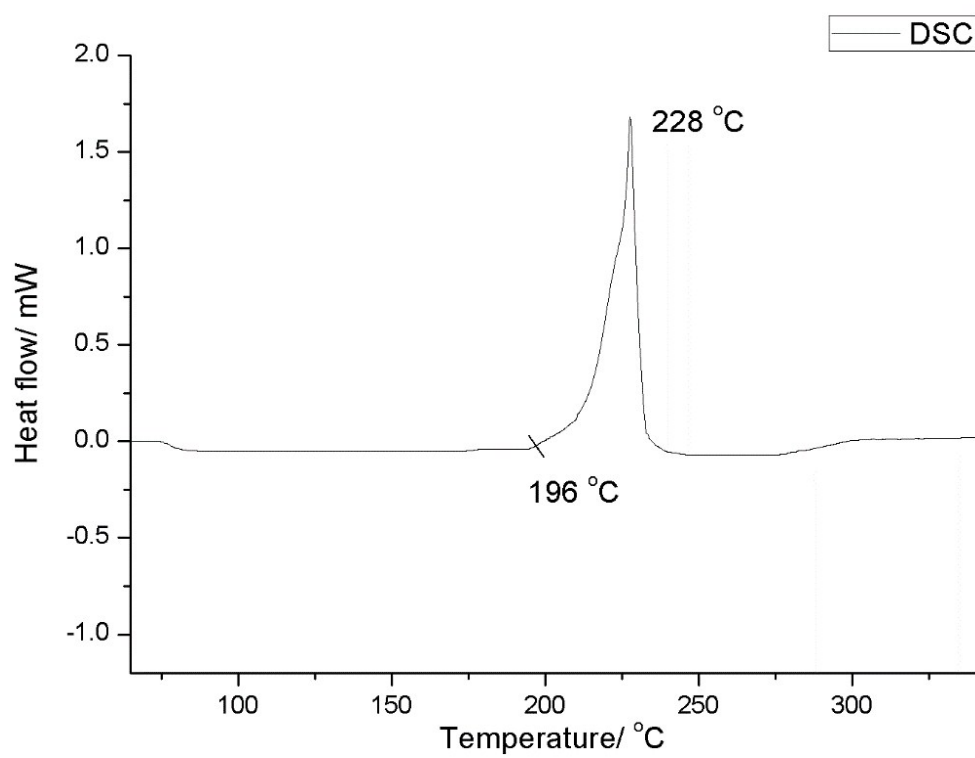

**Fig. S35** DSC curves of **13** under nitrogen with a heating rate of 5 °C min<sup>-1</sup>.
